1 **A systematic survey of regional multitaxon biodiversity: evaluating**  
2 **strategies and coverage**

3 **Ane Kirstine Brunbjerg<sup>1</sup>, Hans Henrik Bruun<sup>2</sup>, Lars Brøndum<sup>3</sup>, Aimée T.**  
4 **Classen<sup>4,5</sup>, Kåre Fog<sup>6</sup>, Tobias G. Frøslev<sup>7</sup>, Irina Goldberg<sup>2</sup>, Morten D.D. Hansen<sup>3</sup>,**  
5 **Toke T. Høye<sup>1,8\*</sup>, Thomas Læssøe<sup>2</sup>, Gregory S. Newman<sup>4,5</sup>, Lars Skipper<sup>3</sup>, Ulrik**  
6 **Søchting<sup>2</sup>, Rasmus Ejrnæs<sup>1</sup>**

7 <sup>1</sup> *Section for Biodiversity & Conservation, Department of Bioscience, Aarhus University, DK-*  
8 *8410 Rønde, Denmark (present address)*

9 <sup>2</sup> *Section for Ecology and Evolution, Department of Biology, University of Copenhagen, DK-*  
10 *2100 Copenhagen, Denmark / Natural History Museum of Denmark, Universitetsparken 15,*  
11 *University of Copenhagen, DK-2100 Copenhagen, Denmark*

12 <sup>3</sup> *Natural History Museum Aarhus, DK-8000 Aarhus C, Denmark*

13 <sup>4</sup> *Rubenstein School of Environment and Natural Resources, University of Vermont, Burlington,*  
14 *VT 05405, USA,*

15 <sup>5</sup> *Center for Macroecology, Evolution and Climate, Natural History Museum of Denmark,*  
16 *University of Copenhagen, DK-1350 Copenhagen, Denmark.*

17 <sup>6</sup> *Hesselholm 107, 3670 Veksø, Denmark*

18 <sup>7</sup> *Center for GeoGenetics, University of Copenhagen, DK-2100 Copenhagen, Denmark*

19 <sup>8</sup> *Arctic Research Centre, Aarhus University, Ny Munkegade 114, building 1540, DK-8000*  
20 *Aarhus C, Denmark*

21 \* Corresponding author: Tel.: +45 87158892, E-mail address: [tth@bios.au.dk](mailto:tth@bios.au.dk)

22

23 **Abstract**

24 **Background:** In light of the biodiversity crisis and our limited ability to explain variation in  
25 biodiversity, it is time to rethink the way we study biodiversity and its causes. Inspired by the  
26 recently published ecospace framework, we developed a protocol for environmental and biotic  
27 mapping that is scalable to habitats, ecosystems and biomes. We applied our protocol as part of a  
28 comprehensive biodiversity study in Denmark. We selected study sites (40 × 40 m) using  
29 stratified random sampling along the major environmental gradients underlying biotic variation.  
30 Using standard methods, we collected vascular plant, bryophyte, macrofungi, lichen, gastropod  
31 and arthropod species lists for each site. To evaluate sampling efficiency, we calculated regional  
32 coverage (relative to the number of species known from Denmark per taxonomic group), and  
33 project scale coverage (i.e., based on the sample coverage per taxonomic groups). To cover  
34 eukaryotic organisms that are less easily targeted by classical inventories (e.g., nematodes, “non-  
35 fruiting” fungi) we collected soil samples for environmental DNA analyses. Finally, to assess  
36 site conditions, we conducted a comprehensive mapping of abiotic conditions (position), biotic  
37 resources (expansion of organic carbon) and habitat continuity (spatial and temporal).

38 **Results:** The 130 study sites covered 0.0005% of the Danish terrestrial area (~42,500 km<sup>2</sup>). We  
39 found 2040 species of macrofungi (62% of the Danish fungal pool), 663 vascular plant species  
40 (42%), 254 bryophyte species (41%) and 202 lichen species (20%). For invertebrates, we  
41 observed 334 spider species (59%), 126 carabid beetle species (38%) and 105 hoverfly species  
42 (36%). Overall, sample coverage was high across taxonomic groups, indicating that 130 sites  
43 were sufficient to represent the variation in biodiversity across Denmark. This inventory is  
44 unprecedented in detail and resulted in the discovery of 150 species with no previous record for

45 Denmark. Comparison of soil DNA with observed plants was both strong and confirmative for a  
46 recovery of plant biota by soil-derived DNA.

47 **Conclusions:** We successfully covered the majority of targeted biodiversity across Denmark  
48 using an approach that includes habitat coverage, multi-taxon biodiversity assessment, and  
49 ecospace mapping. Our approach can be readily applied to assess biodiversity for other  
50 ecoregions.

51 **Keywords:** Abiotic gradients, Biotic factors, Continuity, Denmark, Disturbance, eDNA,  
52 Moisture, Productivity

## 53 **Background**

54 The vast number of species on Earth have yet to be described, challenging our understanding of  
55 biodiversity [1]. For a deeper understanding of what determines the distribution of species across  
56 the planet, comprehensive data on species occurrence and environmental conditions are required.  
57 While some progress has been made in understanding the distribution of biodiversity at coarse  
58 spatial resolution, our knowledge of biodiversity at high spatial resolution is deficient [2]. In this  
59 study we consider biodiversity as the richness and turnover of taxonomic units, whether species  
60 or operational taxonomic units (OTUs) derived by meta-barcoding. Further, models of  
61 biodiversity for less well-known, but mega-diverse groups such as fungi and insects are almost  
62 non-existent across spatial scales [1]. Compared to targeted and systematic monitoring based on  
63 well-defined *a priori* hypotheses, surveillance data are often biased [e.g. temporal, spatial,  
64 taxonomic bias, 3] and therefore less appropriate and efficient for conservation management [4].

65 Recent developments in molecular techniques – in particular the extraction and sequencing  
66 of environmental DNA (eDNA) – hold the promise of more time-efficient sampling and  
67 identification of species [5, 6]. Further, eDNA enables the exploration of communities and  
68 organisms not easily recorded by traditional biodiversity assessment, such as soil-dwelling  
69 nematodes [7] . In fact, PCR-based methods combined with DNA sequencing have already  
70 provided valuable insight in the taxonomic diversity within complex environmental samples,  
71 such as soil [8-10] and water [e.g. 11, 12]. Due to the ongoing rapid development in DNA  
72 sequencing technology, with the emergence of next generation sequencing (NGS) techniques -  
73 generating billions of DNA sequences [13] - an environmental sample could now potentially be  
74 analyzed to a depth, which gives an almost exhaustive picture of the species composition at the  
75 site of collection. However promising, assessment of entire organismal communities from eDNA

76 samples is still in its early stages [6, 12, 14]. To assess the suitability and potential of eDNA data  
77 in complementing - or even replacing - traditional field survey data, tests on comprehensive data  
78 sets need to be done.

79 In sampling design, the ecospace framework [15] was followed. Thus, we aimed at a  
80 systematic sampling of the major aspects of environmental conditions (position), biotic resources  
81 (expansion) and spatio-temporal extent of biotopes (continuity). Environmental conditions and  
82 local processes may be considered a template shaping local biodiversity (e.g. through  
83 environmental filtering) [16, 17]. This aspect is reflected in ecospace position of sampled  
84 biotopes in abiotic environmental space. In addition to the physico-chemical conditions shaping  
85 abiotic gradients, particularly important to autotrophic organisms, we considered the presence  
86 and abundance of specific carbon resources, crucial to heterotrophic organisms, such as specialist  
87 herbivores, detritivores and saproxylic species [18]. The recording of organic carbon resources  
88 and structures, e.g. dead wood, dung and carcasses, is not often included in community studies,  
89 although the limited knowledge in the area [15, 19] speaks for further studies. Spatial and  
90 temporal processes at regional extent, such as extinction, speciation and migration, shape species  
91 pools and thereby set the limits to local richness and species composition [16, 17, 20]. In order to  
92 improve our understanding of biodiversity patterns, local and regional factors should be  
93 considered concurrently [17, 21]. Thus, in our study, we recorded spatial and temporal continuity  
94 of the local biotopes.

95 The aim of this study was to describe a comprehensive biodiversity monitoring protocol and  
96 evaluate its efficacy in describing environmental gradient variation and biodiversity across a  
97 large region. Here, we present the protocols we used in the project called *Biowide* to  
98 systematically and comprehensively map regional biodiversity and environmental heterogeneity

99 across Denmark - an area of limited geographical extent and with a relatively homogeneous  
100 climate. We aimed to cover all of the major environmental gradients, including natural variation  
101 in moisture, soil fertility and succession, as well as habitats under cultivation. Within this  
102 environmental space, we performed a systematic and comprehensive sampling of the  
103 environment and biodiversity. We combined traditional species observation and identification  
104 with modern methods of biodiversity mapping in the form of sequencing of eDNA soil samples.

## 105 **Methods**

### 106 **Study area and site selection**

107 We aimed to characterize biodiversity across the country of Denmark (Fig. 1a); a lowland area of  
108 42,500 km<sup>2</sup> and an elevational range below 200 m. While there are some limestone and chalk  
109 outcrops, there is no exposed bedrock in the investigated area. Soil texture ranges from coarse  
110 sands to heavy clay and organic soils of various origins [22]. Land-use is dominated by arable  
111 cultivation (61 %), most of it in annual rotation, while forest, most of which are plantations  
112 established in the 19<sup>th</sup> and 20<sup>th</sup> centuries, and scrub cover approx. 17 %, natural and semi-natural  
113 terrestrial habitats some 10 %, and freshwater lakes and streams 2 %. The remaining 10 % is  
114 made up of urban areas and infrastructure [23, 24].

115 When selecting sites, we considered major environmental gradients, the area we would use as  
116 a sampling unit, as well as practicalities of sampling. The selected observational unit was 40 × 40  
117 m, which was a compromise between homogeneity and representativeness. We stratified site  
118 selection according to the identified major environmental gradients, including the intensity of  
119 human land use. We allocated 30 sites to cultivated habitats and 100 sites to natural and semi-  
120 natural habitats. The cultivated subset represented major land-use categories and the natural  
121 subset was stratified across natural gradients in soil fertility, soil moisture, and successional stage  
122 from sparsely vegetated to closed canopy forest, (Appendix A). We deliberately excluded linear  
123 features, such as hedgerows and road verges, urban areas with predominantly exotic plants as  
124 well as saline and aquatic habitats, but included temporarily inundated heath and dune  
125 depressions as well as wet mires.

126 The final set of 24 sampling strata consisted of six cultivated habitat types; three types of  
127 fields (rotational, grass leys, set aside) and three types of plantations (beech, oak, spruce). The

128 remaining 18 natural strata constituted all factorial combinations of natural soil fertility (fertile  
129 and infertile), moisture (dry, moist and wet), and successional stage (low vegetation with bare  
130 soil, closed herb/scrub and forest) (Appendix A). These 24 strata were replicated in each of five  
131 geographical regions within Denmark (Fig. 1a). Finally, we included a subset of 10 sites placed  
132 within perceived hotspots for biodiversity in Denmark, selected subjectively by public polling  
133 among active natural history volunteers in the Danish nature conservation and nature  
134 management societies, but restricted so that each region held two hotspots. The result was 130  
135 sites within 18 natural and 6 cultivated strata evenly distributed over the five geographic regions  
136 of Denmark (Table 1).

137 For the 18 natural habitat strata, site selection through stratified random sampling was  
138 guided by a large nation-wide data set of vegetation plots ( $n = 96,400$  quadrats of  $78.5 \text{ m}^2$ ,  
139 [www.naturdata.dk](http://www.naturdata.dk)) from a national monitoring and mapping project [25] and in accordance with  
140 the EU Habitats Directive [26]. We used plant indicator values to identify environmental  
141 conditions to select potential site candidates for the targeted strata. First, we calculated plot mean  
142 values for Ellenberg indicator values based on vascular plants species lists [27] and Grime CSR-  
143 strategy allocations of recorded plants [28], the latter recoded into numeric values following  
144 Ejrnæs & Bruun [29]. We initially excluded saline and artificially fertilized habitats by excluding  
145 plots with Ellenberg  $S > 1$  or Ellenberg  $N > 6$ . We then defined stratification categories as: fertile  
146 (Ellenberg  $N$  3.5-6.0), infertile (Ellenberg  $N < 3.5$ ), dry (Ellenberg  $F < 5.5$ ), moist (Ellenberg  $F$   
147 5.5-7.0), wet (Ellenberg  $F > 7.0$ ), early succession (Grime  $R > 4$  and Ellenberg  $L > 7$  or  $> 10$  %  
148 of annual plants), late succession (mapped as forest), mid succession (remaining sites).



149 To reduce transport time and costs, all 26 sites within each region were grouped into three  
150 geographic clusters (Fig. 1a). The nested sampling design was also considered an opportunity to  
151 take spatially structured species distributions into account [30].

152 The procedure for site selection involved the following steps:

153 1) Designation of three geographic clusters within each region with the aim to cover all  
154 natural strata while a) keeping the cluster area below 200 km<sup>2</sup> and b) ensuring high  
155 between-cluster dispersion in order to represent the geographic range of the region. In  
156 practice, hotspots were chosen first, then clusters were placed with reference to the  
157 highest ranking hotspots and in areas with a wide range of strata represented in our  
158 national monitoring plot data [NOVANA, 31].

159 2) Representing 24 strata in each region by selecting 8-9 potential sites in each cluster.  
160 Natural strata were selected from classified field-plot data whereas cultivated strata were  
161 assumed omnipresent and used as buffers in the process of completing the non-trivial task  
162 of finding all strata within three restricted cluster areas in each region.

163 3) Negotiating with land owners and, in case of disagreement, replacing the preferred site  
164 with an alternative site from the same stratum.

165 After each of the 130 sites were selected using available data we established each 40 × 40 m  
166 field site in a subjectively selected homogenous area that accounted for topography and  
167 vegetation structure. Each site was divided into four 20 × 20 m quadrants and from the center of  
168 each quadrant a 5 m radius circle (called a plot) was used as a sub-unit for data collection to  
169 supplement the data collected at site level (40 × 40 m) (Fig. 1b).

## 170 **Collection of biodiversity data**

171 For each of the 130 field inventory sites, we aimed to make an unbiased and representative  
172 assessment of the multi-taxon species richness. Data on vascular plants, bryophytes, lichens,  
173 macrofungi, arthropods and gastropods were collected using standard field inventory methods  
174 (Appendix B). For vascular plants, bryophytes and gastropods, we collected exhaustive species  
175 lists. For the remaining taxonomic groups that are more demanding to find, catch, and identify,  
176 we aimed to collect a reproducible and un-biased sample through a standardized level of effort  
177 (typically one hour). Each site was carefully examined for lichens and macrofungi assessing  
178 various substrates (soil, herbaceous debris, wood, stone surfaces and bark of trees up to 2 m). For  
179 fungi, we visited each site twice during the main fruiting season in 2014 – in August and early  
180 November – and once during the main fruiting season in 2015 – from late August to early  
181 October. Specimens that were not possible to identify with certainty in the field were sampled  
182 and, when possible, identified in the laboratory. For arthropod sampling, a standard set of pitfall  
183 traps (including meat-baited and dung-baited traps), yellow Mörnicke pan traps and Malaise traps  
184 were operated during a fixed period of the year. In addition, we used active search and collection  
185 methods, including sweep netting and beating as well as expert searches for plant galls, miners  
186 and gastropods. Finally, we heat-extracted collembolas and oribatid mites from soil cores. Due to  
187 the limited size of the sites relative to the mobility of mammals, birds, reptiles and amphibians,  
188 data on these groups were not recorded. Taxonomic data will be transferred to the Global  
189 Biodiversity Information Facility (GBIF, <http://www.gbif.org/>) and specimens to the Natural  
190 History Museums, when the project ends in 2017. For further details on methods for collection of  
191 biodiversity data see Appendix B.

## 192 **Collection of eDNA data**

193 We used soil samples collected from all 130 sites for the eDNA inventory. At each site, we  
194 sampled soil cores in grids embedded in the  $9 \times 9$  plots (81 soil cores per site) and pooled the  
195 collected samples after removal of coarse litter. We homogenized the soil by mixing with a  
196 drilling machine mounted with a mixing paddle. A subsample of soil was sampled from the  
197 homogenized sample and DNA was extracted for marker gene amplification and sequencing  
198 [14]. We chose the MiSeq platform by Illumina for DNA sequencing because, relative to other  
199 platforms (e.g., 454 b Roche), it produces 15 times the sequence output (approx. 15 000 000  
200 reads). MiSeq is adapted to amplicon sequencing [32]. To our knowledge such comprehensive  
201 regional inventories of soil communities has not been carried out before.

202 For further details on methods for eDNA data and considerations on eDNA species richness  
203 and community composition measures see Appendix B.

#### 204 **Site environmental data**

205 We have followed the suggestion in Brunbjerg et al. [15] to describe the fundamental  
206 requirements for biodiversity in terms of the ecospace (position, expansion and spatio-temporal  
207 continuity of the biotope).

#### 208 *Position*

209 To assess the environmental variation across the 130 sites, we measured a core set of site factors  
210 that described the abiotic conditions at each site. Environmental recordings and estimates  
211 included soil pH, total soil carbon (C,  $\text{g/m}^2$ ), total soil nitrogen (N,  $\text{g/m}^2$ ) and total soil  
212 phosphorus (P,  $\text{g/m}^2$ ), soil moisture (% volumetric water content), leaf CNP (%), soil surface  
213 temperature ( $^{\circ}\text{C}$ ) and humidity (vapour pressure deficit), air temperature ( $^{\circ}\text{C}$ ) and light intensity  
214 (Lux). For further details on methods for collection of the abiotic data see Appendix B.

215 ***Expansion***

216 We collected measurements that represented the organic C resources species consume as well as  
217 organic C structures that species can use as habitat. While many invertebrates are associated with  
218 other animals, in order to accomplish accurate sampling of the focal species we restricted our  
219 mapping of carbon space to the variation in live and dead plant tissue, including dung. We  
220 measured litter mass ( $\text{g}/\text{m}^2$ ), plant species richness, vegetation height (of herb layer, cm), cover  
221 of bare soil (%), bryophyte cover (%) and lichen cover (%), dead wood volume ( $\text{m}^3/\text{site}$ ),  
222 dominant herbs, the abundance of woody species, the number of woody plant individuals, flower  
223 density (basic distance abundance estimate, [33]), density of dung (basic distance abundance  
224 estimate), number of carcasses, fine woody debris density (basic distance abundance estimate),  
225 ant nest density (basic distance abundance estimate), boulders density and water puddle density  
226 (basic distance abundance estimate). For further details on methods for collection of expansion  
227 data see Appendix B.

228 ***Mapping of temporal and spatial continuity***

229 For each site, we inspected a temporal sequence of aerial photos (from 1945 to 2014) and  
230 historical maps (1842-1945) starting with the most recent photo taken. We defined temporal  
231 continuity as the number of years since the most recent major and documented land use change.  
232 The year in which a change was identified was accepted as time for ‘break in continuity’. To  
233 estimate spatial continuity, we used ArcGIS to construct four buffers for each site (500 m, 1000  
234 m, 2000 m, 5000 m). Within each buffer we estimated the amount of habitat similar to the site  
235 focal habitat by visual inspection of aerial photos with overlays representing nation-wide  
236 mapping of semi-natural habitat. For further details on methods for collection of continuity data  
237 see Appendix B.

## 238 **Analyses**

239 To illustrate the coverage of the three main gradients (moisture, fertility, and successional stage)  
240 spanned by the 130 sites, Ellenberg mean site values (mean of mean Ellenberg values for the  
241 four 5m radius quadrats within each site) for soil moisture (Ellenberg F), soil nutrients  
242 (Ellenberg N) and light conditions (Ellenberg L) were plotted relative to Ellenberg F, N and L  
243 values for a reference data set of 5m radius vegetation quadrats (47,202 from agricultural, semi-  
244 natural and natural open vegetation and 12,014 from forests ([www.naturdata.dk](http://www.naturdata.dk)) [25]. Mean  
245 Ellenberg values were only calculated for quadrats with more than five species and 95 percentile  
246 convex hull polygons were drawn for the reference data set as well as the Biowide data set.

247 We assessed the regional coverage of species in the project, with reference to the number of  
248 known species from Denmark according to the taxonomic database Allearter ([www.allearter.dk](http://www.allearter.dk)).  
249 This portal represents the most up-to-date list of species known from Denmark. Coverage (or  
250 sample completeness) was estimated for each taxonomic group across sites (Biowide coverage)  
251 as well as for each site individually (site coverage) for species groups with abundance data  
252 (Diptera, Coleoptera and Araneae) by comparing the number of species found to the estimated  
253 species richness of the sample using the iNEXT R-package [34].

254 To further evaluate how well we covered the environmental gradient for our inventory, we  
255 related community composition to the measured environmental variables (abiotic and biotic)  
256 based on a Nonmetric Multidimensional Scaling (NMDS) analyses in R v. 3.2.3 [35] using the  
257 vegan R-package [36] and the plant species  $\times$  site matrix as well as the macrofungi species  $\times$  site  
258 matrix. Abiotic and biotic variables were correlated with ordination axes to facilitate  
259 interpretation.

260 To illustrate and substantiate the adequacy of the eDNA sampling protocol and subsequent  
261 laboratory protocols, we correlated basic biodiversity measures of community composition  
262 (NMDS axes) and richness for plant eDNA (ITS2 marker region) with the same measures for our  
263 observed plant data (see Appendix B for detailed methods).  
264

## 265 **Results**

266 The 130 sites were distributed in 15 clusters nested within five regions across Denmark (Fig. 1a).  
267 The measured variables differed according to the initial stratification of sites based on simple  
268 indicators (Table 1, Fig. 2a, b, ranges of measured variables in Appendix C). Managed sites  
269 (plantations and agricultural fields) revealed little variation in soil moisture (Fig. 2b). The  
270 Hotspots spanned the full variation of natural sites regarding fertility, moisture and successional  
271 stage (Fig 2b).

272 The selected 130 sites covered the main gradients reflected by a huge reference dataset from a  
273 national monitoring program (Fig. 3) as judged from a vegetation-based calibration of site  
274 conditions regarding moisture, fertility and succession (light intensity). Biowide data seemed to  
275 increase the upper range of the fertility gradient, which can be explained by the inclusion in  
276 Biowide of rotational fields that were not included in reference data (Fig. 2b, 3).

277 The environmental expansion of ecospace, which was measured as the amount and  
278 differentiation of organic carbon sources, varied among habitat types with high litter mass in  
279 plantations and late successional habitats, high plant species richness in early and mid-  
280 successional habitats, high dung density in open habitats (early successional and fields) and high  
281 amounts of dead wood in late successional habitats (Fig. 4). Spatial and temporal continuity  
282 varied for the 130 sites with less spatial continuity at larger buffer sizes (Fig. 5). The number of  
283 species found per site differed with taxonomic group with the highest number for macrofungi  
284 and lowest for bryophytes and lichens (Fig. 6).

285 We collected 2040 species of macrofungi (corresponding to 62 % of the number of  
286 macrofungi recorded in Denmark), 202 lichens (20 %), 663 vascular plants (42 %) and 254  
287 bryophytes (41 %) during the monitoring period. We collected 75 species of gastropods (75 %),

288 334 spiders (59 %), 105 hoverflies (36 %), 126 carabid beetles (38 %) and 203 galler and miner  
289 species (21 %). For all groups except macrofungi, the number of species found was highest in  
290 natural sites (90 sites of 130), but across taxonomic groups, plantations and agricultural fields  
291 harbored unique species – plantations were particularly important in harboring unique species of  
292 macrofungi (Table 2). The taxonomic sample coverage calculated by rarefaction within the 130  
293 sites was high overall (range: 0.86-0.99), but highest for gastropods and spiders and lowest for  
294 gallers and miners (Table 2).

295 The inventory was unprecedented in detail and resulted in a total of 118 new macrofungi, 1  
296 new lichen and 32 new invertebrate species (of which 12 were gallers and miners and 3 spiders)  
297 that had not previously been documented in Denmark (Table 2).

298 The NMDS ordination (3-dimensional, final stress = 0.102) accounted for 81 % of the  
299 variation in plant species composition and 72 % of the variation in macrofungal species  
300 composition (3-dimensional, final stress = 0.146). The major gradients in plant species  
301 composition of the 130 sites correlated strongly with soil fertility (NMDS axis 1 strong  
302 correlation with soil N, P and pH), successional stage (NMDS axis 2 strong correlation with light  
303 intensity and opposite correlation with litter mass and number of large trees) and soil moisture  
304 (NMDS axis 3 strong correlation with measured soil moisture), reflecting the gradients that the  
305 sites were selected to cover (Fig. 7, see correlation matrix for the rest of the environmental  
306 variables in Appendix D). Macrofungal species composition showed the same gradients,  
307 however succession and fertility swapped with succession as primary gradient (NMDS1) and  
308 fertility as secondary gradient (NMDS2). NMDS axis 3 reproduced a strong correlation with soil  
309 moisture.



310 Spearman Rho correlations between observational plant species richness and eDNA OTU  
311 'richness' as well as observational plant community composition (as represented by NMDS axes  
312 1-3) and eDNA OTU composition were both strong and confirmative for a recovery of plant  
313 diversity by soil-derived DNA ( $R^2_{\text{richness}}=0.652$ ,  $R^2_{\text{composition}}=0.577-697$ , Fig. 8).

## 314 **Discussion**

315 Using ecospace as conceptual framework [15], we developed a protocol for mapping terrestrial  
316 biodiversity at a regional level and covering numerous, mega-diverse taxa. Across the 130  
317 surveyed sites, covering a tiny fraction (0.0005 %) of the total area of Denmark, we observed a  
318 total of ~5 700 species, of which 150 represented new species records for the country, and 20-75  
319 % of known regional species number of species depending on taxonomic group. Our data  
320 indicated that the sampling at 130 sites sufficiently covered the known local and regional  
321 environmental variation of Denmark and also delivered a good coverage of biodiversity at the  
322 spatial scale of sites – even for diverse groups of invertebrates and fungi. Finally, the study  
323 demonstrates that eDNA data, once properly curated (Frøslev et al. submitted), may be used as  
324 an important supplement to classical biodiversity monitoring.

325 Environmental filtering is an important process in community assembly, reflecting the  
326 prominent role of niche-differentiation in evolution [37]. The most obvious design principle for a  
327 biodiversity inventory is, therefore, to stratify sampling according to major abiotic and biotic  
328 environmental gradients [e.g. 38]. We found a close correspondence between the variation in  
329 average Ellenberg values at our sites and those extracted from a very large vegetation database  
330 comprising vascular plant species lists from a national monitoring program. This indicates an  
331 almost complete gradient coverage in our study and allows us to generalize relationships  
332 between environment and biodiversity derived from local measurements across gradients to a  
333 large spatial extent. Although the use of stratified random sampling implies a biased  
334 representation of rare and common environmental conditions, complete random sampling would  
335 have led to limited representation of natural biotopes and their disproportionate contribution to  
336 the total biodiversity may have been missed.

337 While the ecospace framework helped structure our sampling, it also proved challenging with  
338 respect to decisions about site area and homogeneity (related to ecospace position), recording of  
339 carbon resources (assessing ecospace expansion) and definition of temporal and spatial  
340 continuity. Ideally, abiotic and biotic conditions should be homogenous across a site in order to  
341 ensure that site measurements reflect the abiotic position and biotic expansion [15]. Thus, site  
342 area was a trade-off between homogeneity (small area) and representativeness (large area) and  
343 across long environmental gradients, homogeneity and representativeness may vary among for  
344 example, grassland, heathland, and forest. Similarly, while counting the number of different  
345 plant species is easy, accounting for the relative contribution of each species to total biomass and  
346 measuring the availability of different pools of wood, woody debris, litter, dung, flowers and  
347 seeds is much harder. Finally, spatial and temporal continuity is hard to quantify due to data  
348 limitations and because past soil tillage, fertilization, or other land management or disturbance  
349 regimes have not been recorded and must be inferred. In addition, an unambiguous definition of  
350 continuity breaks is impossible given that most land use changes and derived community  
351 turnover occur gradually over time. We estimated spatial continuity using broad habitat classes at  
352 a range of scales (500 m, 1000 m, 2000 m, 5000 m) acknowledging that the dependency on  
353 spatio-temporal continuity depend on the mobility, life history and habitat specificity of different  
354 species. Our estimates of temporal continuity were also limited by the availability of aerial  
355 photographs and maps, which while not perfect, is good relative to other parts of the world.  
356 Despite these constraints, our estimates of spatial and temporal continuity varied among sites and  
357 were uncorrelated, which allowed us to statistically test for their relative roles.

358 We aimed for equal sampling effort per site in terms of trapping and searching time.  
359 However, this was challenged by an array of practicalities. The preferred species sampling

360 methods varied among taxonomic groups [39, 40] and despite our application of a suite of  
361 methods, including passive sampling in pitfall traps and Malaise traps, baited traps, soil core  
362 sampling and active search, our taxonomic coverage is still incomplete (e.g. aphids, Phorid flies  
363 and other species-rich groups living in the canopy are inevitably under-sampled). Our budget  
364 also forced us to be selective with the identification of the most difficult species groups, in  
365 particular within Hymenoptera and Diptera. Among identified groups, species coverage ranged  
366 between 20 and 75 % of all species known to Denmark, which is quite satisfactory. Invertebrate  
367 sampling and identification is extremely time consuming and relies on rare taxonomic expertise.  
368 We spent more than half of the inventory budget on invertebrate sampling and identification, and  
369 yet the site coverage remained modest in some sites across all invertebrate groups. Invertebrates  
370 constitute by far the largest fraction of the total biota and, for many species, the adult life stage is  
371 short-lived, highly mobile, and the range of active species varies with season [41, 42]. Trapping  
372 also implies a certain risk of suboptimal placement or vandalism by visiting humans, domestic  
373 livestock or wild scavengers. The resulting number of invertebrate species per site is relatively  
374 high and revealed a considerable variation, which gives ample opportunity for comparative  
375 analyses. Furthermore, the high coverage of invertebrates across the full 130 sites indicated that  
376 the variation in site conditions and biota was adequately sampled. The high number of new  
377 species for Denmark, particularly macrofungi, can most likely be attributed to the effort, but also  
378 to the inclusion of habitat types that would otherwise have been avoided or overlooked during  
379 voluntary monitoring. This underpins the qualitative differences between surveillance data and  
380 targeted monitoring [3].

381 Although methods for DNA extraction, amplification, sequencing and bioinformatic  
382 processing are continuously improved and may lead to better biodiversity metrics from

383 environmental samples, collecting representative samples from larger areas with unevenly  
384 distributed species remains a challenge. We pooled and homogenized large amounts of soil,  
385 followed by extraction of intracellular as well as extracellular DNA, from a large subsample, to  
386 maximize diversity coverage within a manageable manual workload. Biodiversity metrics based  
387 on plant DNA were correlated to the same metrics for observational plant data. This indicates  
388 that the procedure for sampling, DNA extraction and amplification can be assumed to be  
389 adequate for achieving amplicon data to quantify variation in biodiversity across wide ecological  
390 and environmental gradients for plants, but most likely also for other organisms present in the  
391 soil. These methods are promising for biodiversity studies of many organism groups that are  
392 otherwise difficult to sample and identify (e.g. nematodes, fungi, protists, and arthropods). High  
393 throughput sequencing methods produce numerous errors [e.g., 43, 44] and it has been suggested  
394 that richness measures should be avoided altogether for HTS studies [45]. Despite the remaining  
395 challenge of relating genetic units to well-known taxonomic entities, our results along with those  
396 presented in Frøslev et al. (in review) indicate that reliable metrics of  $\alpha$ -diversity and community  
397 composition are achievable. With respect to taxonomic annotation, reference databases are far  
398 from complete and the taxonomic annotation of reference sequences are often erroneous.  
399 Furthermore, for many groups of organisms, we have still only described and named a fraction of  
400 the actual species diversity, and the underlying genetic diversity within and between species is  
401 largely unknown for most taxa, leading to uncertainties in OTU (/species) delimitation and  
402 taxonomic assignment of sequence data. This also means that ecological interpretation of  
403 OTU/species assemblages assessed by eDNA is largely impossible as there is little ecological  
404 knowledge that can be linked to OTUs. Thus, for eDNA based biodiversity assessment to further  
405 mature, molecular biologists, ecologists and taxonomists need to work closely together to

406 produce well-annotated reference databases and to relate unnamed OTUs to well-described  
407 ecospace. Our environmental samples for eDNA, including soil and litter samples as well as  
408 extracted DNA will be preserved for the future. This material represents a unique resource for  
409 the further development of methods within ecology and eDNA. As more efficient technologies  
410 become available in the future, it will be possible to process this material at an affordable cost  
411 and derive further insights on the relationship between traditional species occurrence, OTU data  
412 and environmental variation.

## 413 **Conclusion**

414 We have presented a generic protocol to obtain a representative, un-biased sample of multi-taxon  
415 biodiversity stratified with respect to the major abiotic gradients. By testing and evaluating the  
416 protocol, we conclude that it is operational and that observed biodiversity variation may be  
417 accounted for by the measured abiotic and biotic variables. We believe that the ecospace  
418 concept, on which this protocol is developed, can be successfully up-scaled and applied to  
419 biodiversity studies at regional to continental scale. Despite the obvious advantages of eDNA  
420 data (economically and logistically), barcode reference libraries are as yet far too incomplete.  
421 Thus, combining classical taxonomic identification with eDNA sampling proves a promising  
422 approach for biodiversity science.

423 **Additional files**

424 **Additional file 1: Appendix A:** Site characteristics for each of the 130 40 ×40 m sites.

425 **Additional file 2: Appendix B:** Protocols for data collection.

426 **Additional file 3: Appendix C:** Ranges of environmental (abiotic and biotic) variables  
427 measured within the 130 sites as well as species richness of various taxonomic groups.

428 **Additional file 4: Appendix D:** Correlation matrix for NMDS axes 1, 2 and 3 and  
429 environmental variables

## 430 **Authors' contributions**

431 AKB, HHB, AC, TGF, TL, MDDH and RE conceived and designed the study. AKB, HHB, LB,  
432 KF, TGF, IG, TL, GN, LS, US and RE conducted field work. AKB, RE and TGF analyzed the  
433 data and prepared the figures. LB, KF, IG, MDDH, TL, LS, US and HHB sorted and identified  
434 specimens. AKB, HHB, LB, ATC, KF, IG, MDDH, TTH, TGF, TL, GSN, LS, US and RE wrote  
435 the manuscript. All authors have read and approved the final version of the manuscript.

## 436 **Acknowledgements**

437 We thank Ako O. Mirza for plant and soil lab work, Vagn Alstrup and Roar Skovlund Poulsen  
438 for lichen monitoring, volunteers that have helped in data collection, land owners, Karl-Henrik  
439 Larsson for aid in identifying critical corticioid fungi, Leif Örstadius for identifying Psathyrella  
440 collections. In regard to identification of invertebrate specimens we would like to thank Henning  
441 Petersen for identifying Springtails (Collembola), Hjalte Kjærby for identifying Grasshoppers  
442 (Orthoptera) and Harvestmen (Opiliones), Kåre Fog for identifying snails (Gastropoda), Kåre  
443 Würtz Sørensen for identifying various Wasps (Symphyta, Sphecidae, Crabronidae, and  
444 Vespidae), Lars Dyrberg Bruun for identifying spiders (Aranea), Lars Brøndum for identifying  
445 Hoverflies (Syrphidae), Carrion Beetles (Silphidae) as well as Scarabs (Scarabidae), Lars  
446 Skipper for identifying True bugs (Heteroptera), Maja Møholt for identifying Dung beetles  
447 (*Aphodius*, *Onthophagus* and Geotrupidae) and Cantharidae, Marianne Graversen for identifying  
448 Longhorn beetles (Cerambycidae) and Ladybugs (Coccinellidae), Peter Wiberg-Larsen for  
449 identifying Caddisflies (Trichoptera), Mathias Holm for identifying True weevils and Seed  
450 weevils (Curculionidae and Apionidae), Monica Aimeé Harlund Oyre for identifying various  
451 Dipterans (Syrphida, Tachinadae, Stratiomyidae, Acroceridae, Rhagionidae, Tephritidae,  
452 Platyomatidae, Asilidae) as well as Strepsipterans (Strepsiptera) and Book- and Barklice



453 (Psocoptera), Morten D. D. Hansen for identifying Bees (Apoidea), Carrion beetles (Silphidae),  
454 Click beetles (Elateridae), Scarabs (Scarabaeidea) and Dung beetles (*Aphodius*, *Onthophagus*  
455 and Geotrupidae), Ole Fogh Nielsen for identifying net-winged insects (Neuroptera) and  
456 Strepsipterans (Strepsiptera), Oskar Liset Pryds Hansen and Emil Skovgaard Brandtoft for  
457 identifying Ground beetles (Carabidae), Sofie Amund Kjeldgaard and Steffen Kjeldgaard for  
458 identifying Owlet moths (Noctuidae), Mathias G. Skytte for identifying Rove beetles  
459 (Staphylinidae), Simon Haarder for identifying galling and mining arthropods, and Ulrik Hasle  
460 Nielsen for identifying Cicadas (Cicadoidea) as well as numerous other volunteers. In regard to  
461 carrying out the eDNA lab work we would like to thank Anne Aagaard Lauridsen, Sarah Mak,  
462 Stine Raith Richter, Carlotta Pietroni and Ida Broman Nielsen.

463 **Tables**

464 **Table 1:** Stratification of sites in survey. Number of sites (N) within each habitat category  
 465 (fields, plantations, hotspots and natural gradients) and type.

| Habitat                     | Category           | Type                  | N  |
|-----------------------------|--------------------|-----------------------|----|
| <b>Cultivated</b>           | Fields             | Rotational            | 5  |
|                             |                    | Grass ley             | 5  |
|                             |                    | Set aside             | 5  |
|                             | Plantations        | Beech                 | 5  |
|                             |                    | Oak                   | 5  |
|                             |                    | Spruce                | 5  |
| <b>Natural/uncultivated</b> | Hotspots           | NA                    | 10 |
|                             | Natural            | Fertile/Dry/Early     | 5  |
|                             | Natural            | Fertile/Dry/Mid       | 5  |
|                             | Natural            | Fertile/Dry/Late      | 5  |
|                             | Natural            | Fertile/Moist/Early   | 5  |
|                             | Natural            | Fertile/Moist/Mid     | 5  |
|                             | Natural            | Fertile/Moist/Late    | 5  |
|                             | Natural            | Fertile/Wet/Early     | 5  |
|                             | Natural            | Fertile/Wet/Mid       | 5  |
|                             | Natural            | Fertile/Wet/Late      | 5  |
|                             | Natural            | Infertile/Dry/Early   | 5  |
|                             | Natural            | Infertile/Dry/Mid     | 5  |
|                             | Natural            | Infertile/Dry/Late    | 5  |
|                             | Natural            | Infertile/Moist/Early | 5  |
|                             | Natural            | Infertile/Moist/Mid   | 5  |
|                             | Natural            | Infertile/Moist/Late  | 5  |
|                             | Natural            | Infertile/Wet/Early   | 5  |
|                             | Natural            | Infertile/Wet/Mid     | 5  |
| Natural                     | Infertile/Wet/Late | 5                     |    |

466

467

468 **Table 2:** Number of species per taxonomic group found during the project. Number of species per taxonomic group found in natural  
 469 sites (n=90), hotspots (n=10), plantations (n=15) and arable land (n=15). Number of unique species for each stratum and taxonomic  
 470 group is given in parentheses. Regional coverage (number of species found divided by the number of known species for Denmark for  
 471 each taxonomic group, [www.allearter.dk](http://www.allearter.dk)), Biowide coverage (iNEXT function) and site coverage (site coverage range for 130 sites for  
 472 invertebrates with abundance data (iNEXT function)) are given ([www.allearter.dk](http://www.allearter.dk)) as well as the number of new species for Denmark  
 473 found during the project.

|                | Habitat type |             |           |          |             | Coverage         |         |             | New species<br>(Denmark) |
|----------------|--------------|-------------|-----------|----------|-------------|------------------|---------|-------------|--------------------------|
|                | Total        | Natural     | Hotspots  | Arable   | Plantations | Regional         | Biowide | Site        |                          |
| Sites (N)      | 130          | 90          | 10        | 15       | 15          |                  |         |             |                          |
| Plants         | 719          | 601 (225)   | 330 (21)  | 192 (47) | 131 (2)     | 0.36 (719/2017)  | 0.972   | P/A         | 0                        |
| Bryophytes     | 254          | 221 (106)   | 96 (11)   | 20 (3)   | 78 (4)      | 0.41 (254/621)   | 0.974   | P/A         | 0                        |
| Macrofungi     | 2040         | 1550 (1013) | 620 (134) | 146 (19) | 557 (131)   | 0.62 (2040/3274) | 0.920   | P/A         | 118                      |
| Lichens        | 202          | 183 (92)    | 76 (9)    | 19 (5)   | 58 (3)      | 0.20 (202/1035)  | 0.955   | P/A         | 1                        |
| Spiders        | 334          | 308 (102)   | 145 (5)   | 125 (5)  | 126 (12)    | 0.59 (334/570)   | 0.983   | 0.514-0.989 | 3                        |
| Hoverflies     | 105          | 93 (43)     | 36 (3)    | 45 (6)   | 20 (2)      | 0.36 (105/296)   | 0.969   | 0.053-1.000 | 0                        |
| Gastropods     | 75           | 72 (18)     | 42 (0)    | 19 (1)   | 38 (2)      | 0.75 (75/100)    | 0.991   | P/A         | 0                        |
| Carabids       | 126          | 107 (46)    | 34 (3)    | 51 (15)  | 35 (1)      | 0.38 (126/336)   | 0.960   | 0.039-0.977 | 0                        |
| Gallers/miners | 203          | 169 (108)   | 48 (10)   | 19 (6)   | 41 (16)     | 0.21 (203/968)   | 0.863   | P/A         | 12                       |

474

475

476 **Figures**

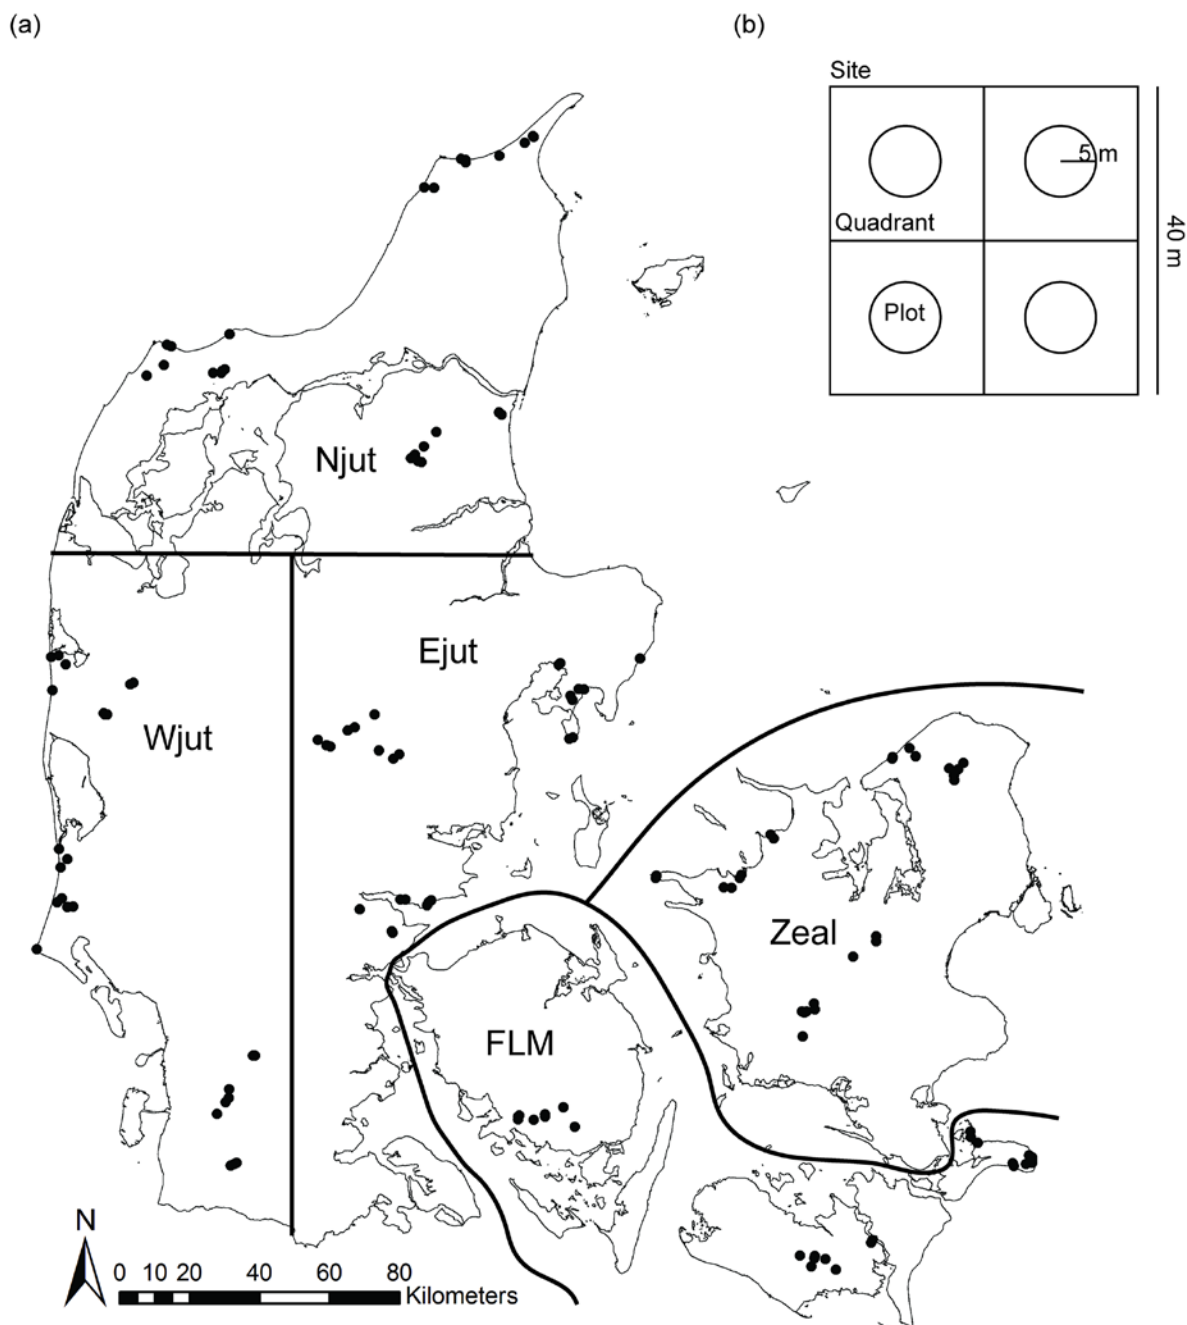

477 **Figure 1:** a) Map of Denmark showing the location of the 130 sites grouped into 15 clusters  
478

479 within five regions (Njut: Northern Jutland, Wjut: Western Jutland, Ejut: Eastern Jutland, FLM:

480 Funen, Lolland, Møn, Zealand: Zealand). b) Site layout with four  $20 \times 20$  m quadrants each  
481 containing a 5 m radius circle (plot).

482

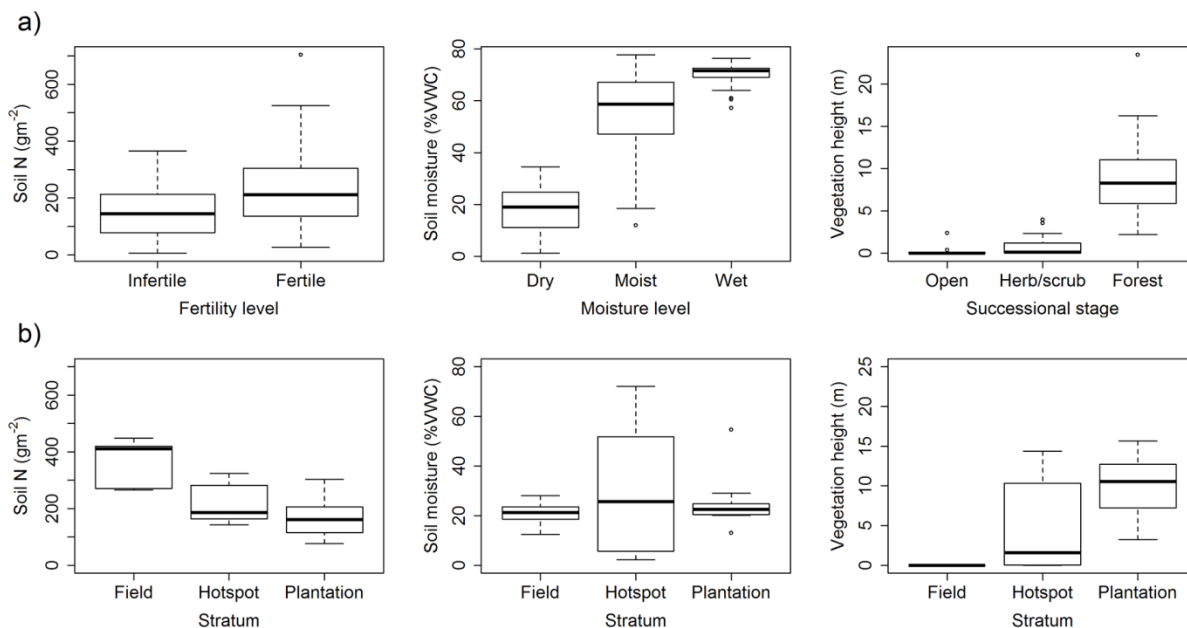

483  
484 **Figure 2:** Validation of the stratification scheme used in site selection. Boxplots of measured  
485 values of nutrient levels (soil N g/m<sup>2</sup>), moisture levels (trimmed site mean % Volumetric Water  
486 Content (VWC)), and vegetation height (mean LIDAR canopy height (m)) for the a) 90 natural  
487 sites of different strata (fertility level: infertile, fertile; moisture level: dry, moist, wet;  
488 successional stage: early (open), mid (herb/scrub), late (forest); and b) the 15 plantations, 15  
489 fields and 10 hotspots.

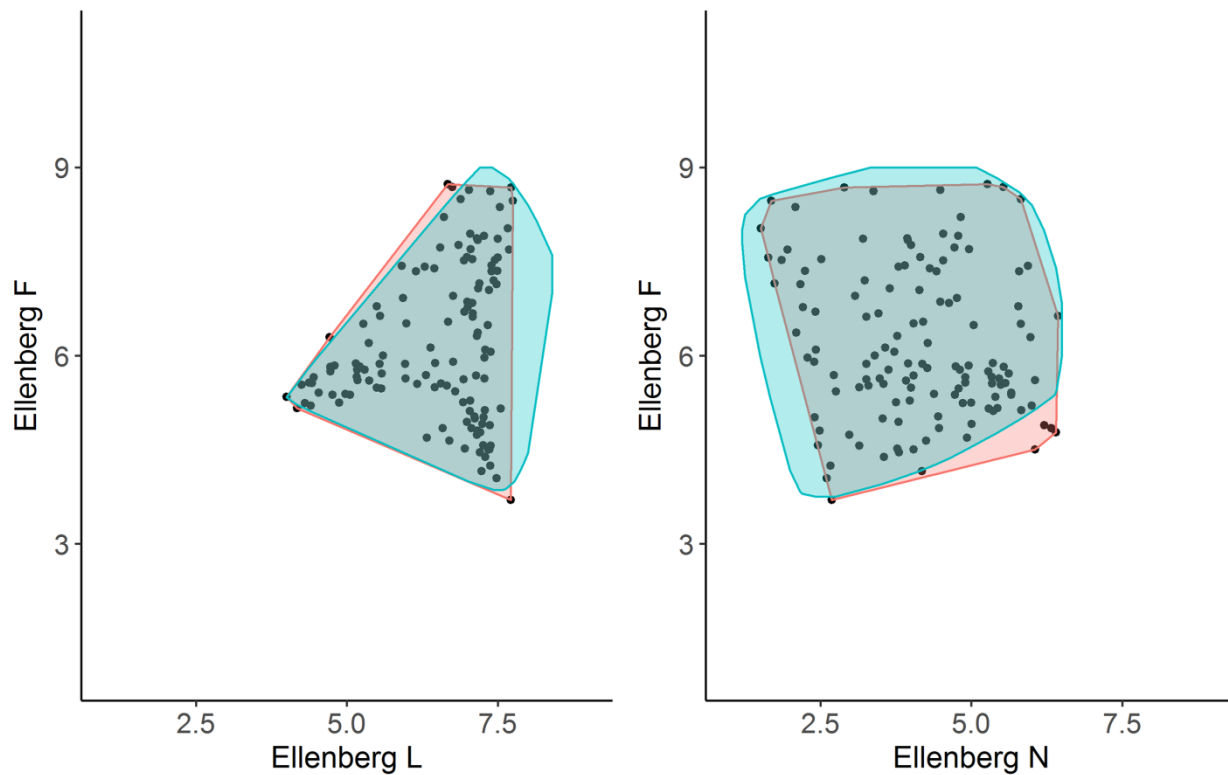

490  
491 **Figure 3:** 95 percentile convex hull plots of Ellenberg F, L and N values from a reference data  
492 set ([www.naturdata.dk](http://www.naturdata.dk)) of open and forest habitat types (blue, n= 59 227) as well as the data set  
493 used in this study, Biowide (red, n=130). Black dots represent Ellenberg values of the 130  
494 Biowide sites.

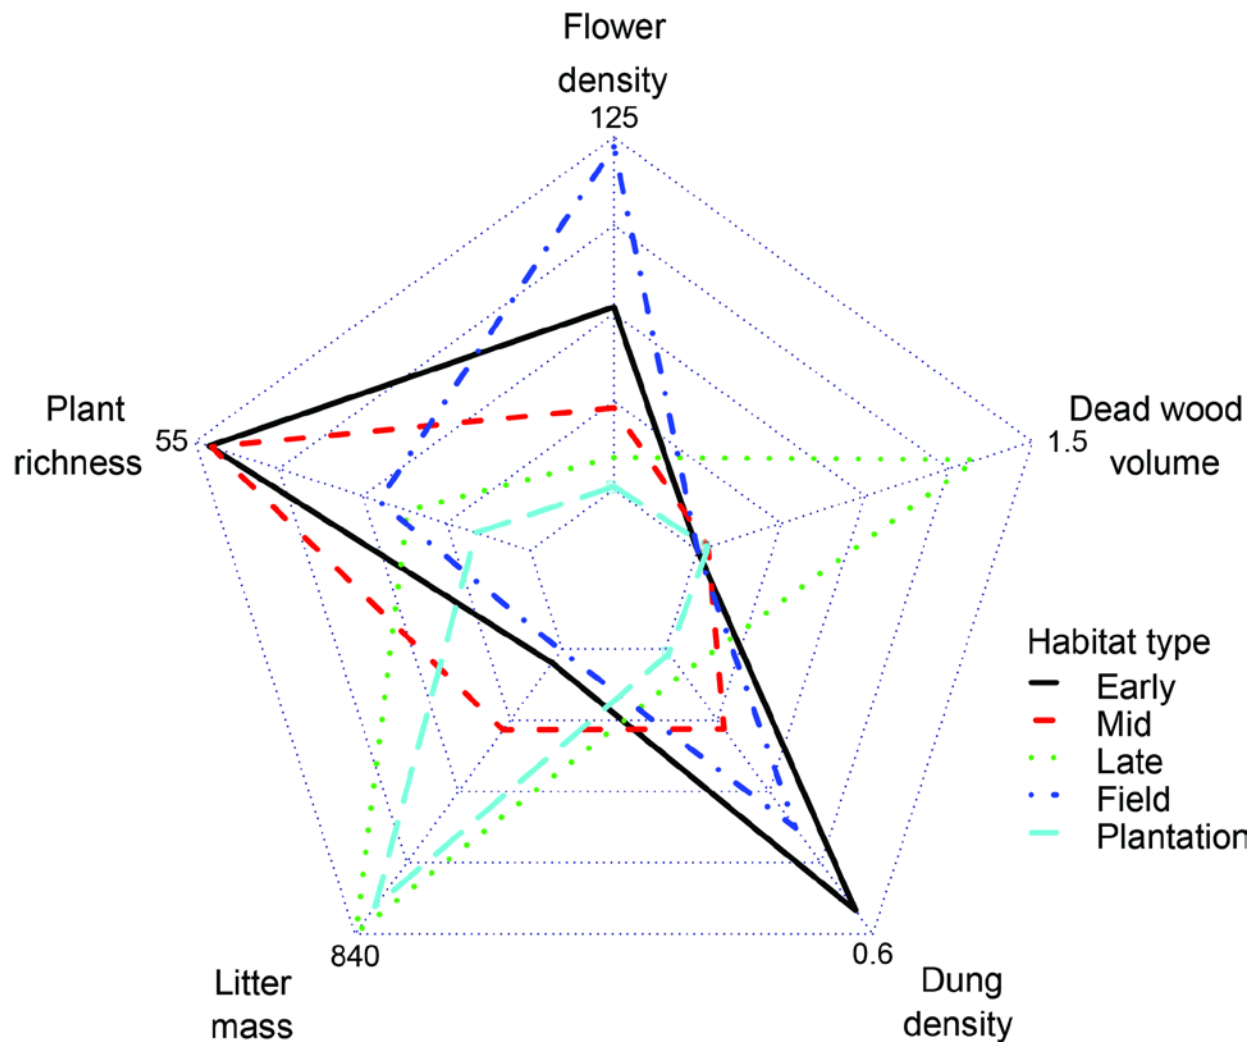

495  
496 **Figure 4:** Habitat mean values for various carbon resources in the 130 40 × 40 m sites. Volume  
497 of dead wood ( $\text{m}^3/\text{ha}$ ), density of dung (cow, sheep, deer, horse, hare) ( $\text{number}/\text{m}^2$ ), summed  
498 flower density in April, June and August ( $\text{number}/\text{m}^2$ ), litter mass ( $\text{g}/\text{m}^2$ ) and plant species  
499 richness per site are depicted for natural habitat types (early, mid and late successional stage),  
500 fields and plantations.



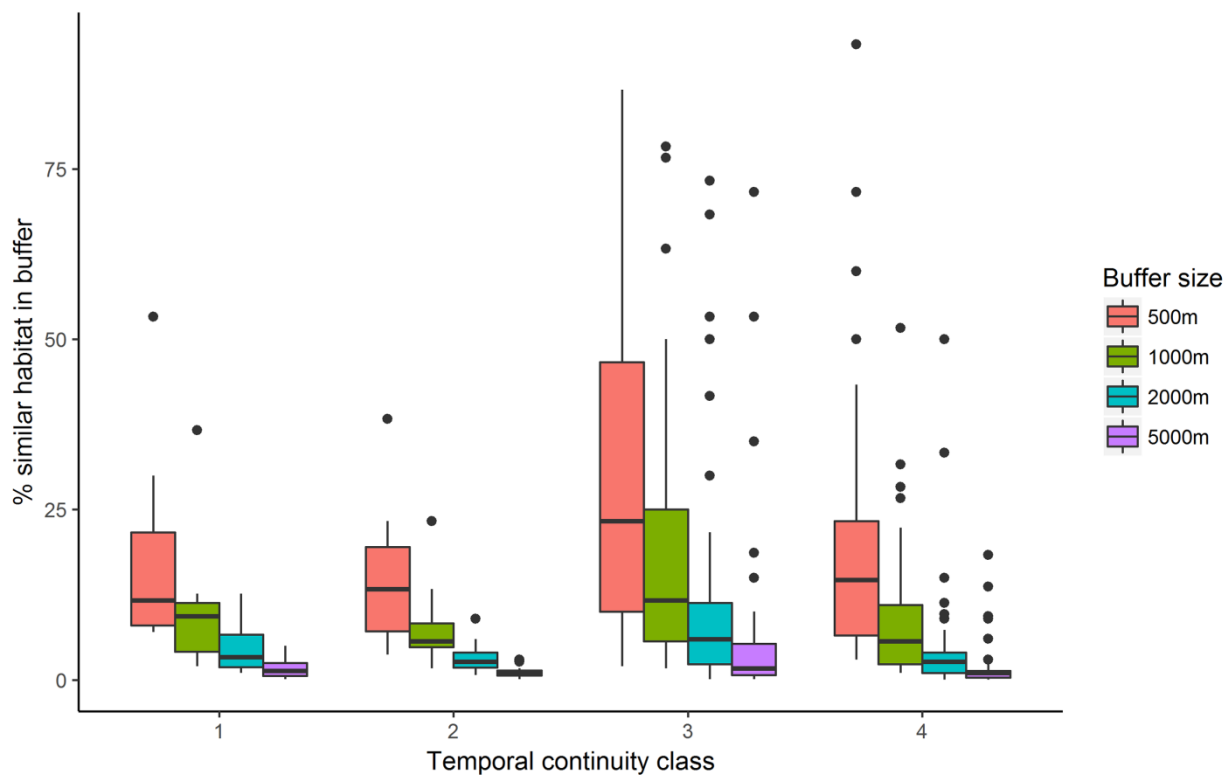

501  
502 **Figure 5:** Temporal and spatial continuity for the 130 Biowide sites. Temporal continuity is  
503 represented on a 4-level ordinal scale: 1: < 15 years of continuity, 2: 15-44 years of continuity, 3:  
504 45-135 years of continuity and 4: >135 years of continuity (or continuous on the oldest available  
505 map). Spatial continuity represents the amount of similar habitat (%) as the focal site habitat  
506 within four different buffer sizes (500m, 1000m, 2000m, 5000m).

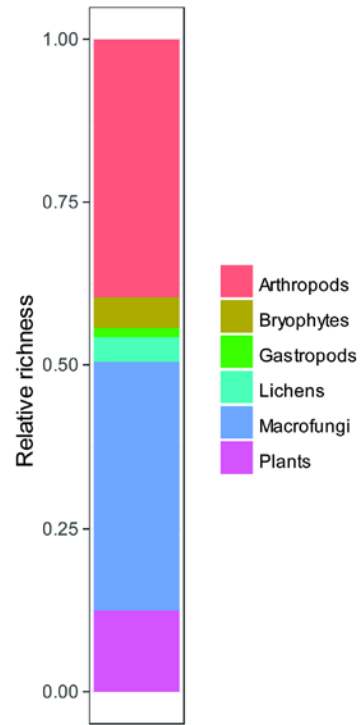

507

508 **Figure 6:** Relative richness of arthropods, bryophytes, gastropods, lichens, macrofungi and  
509 vascular plants across all 130 sites.

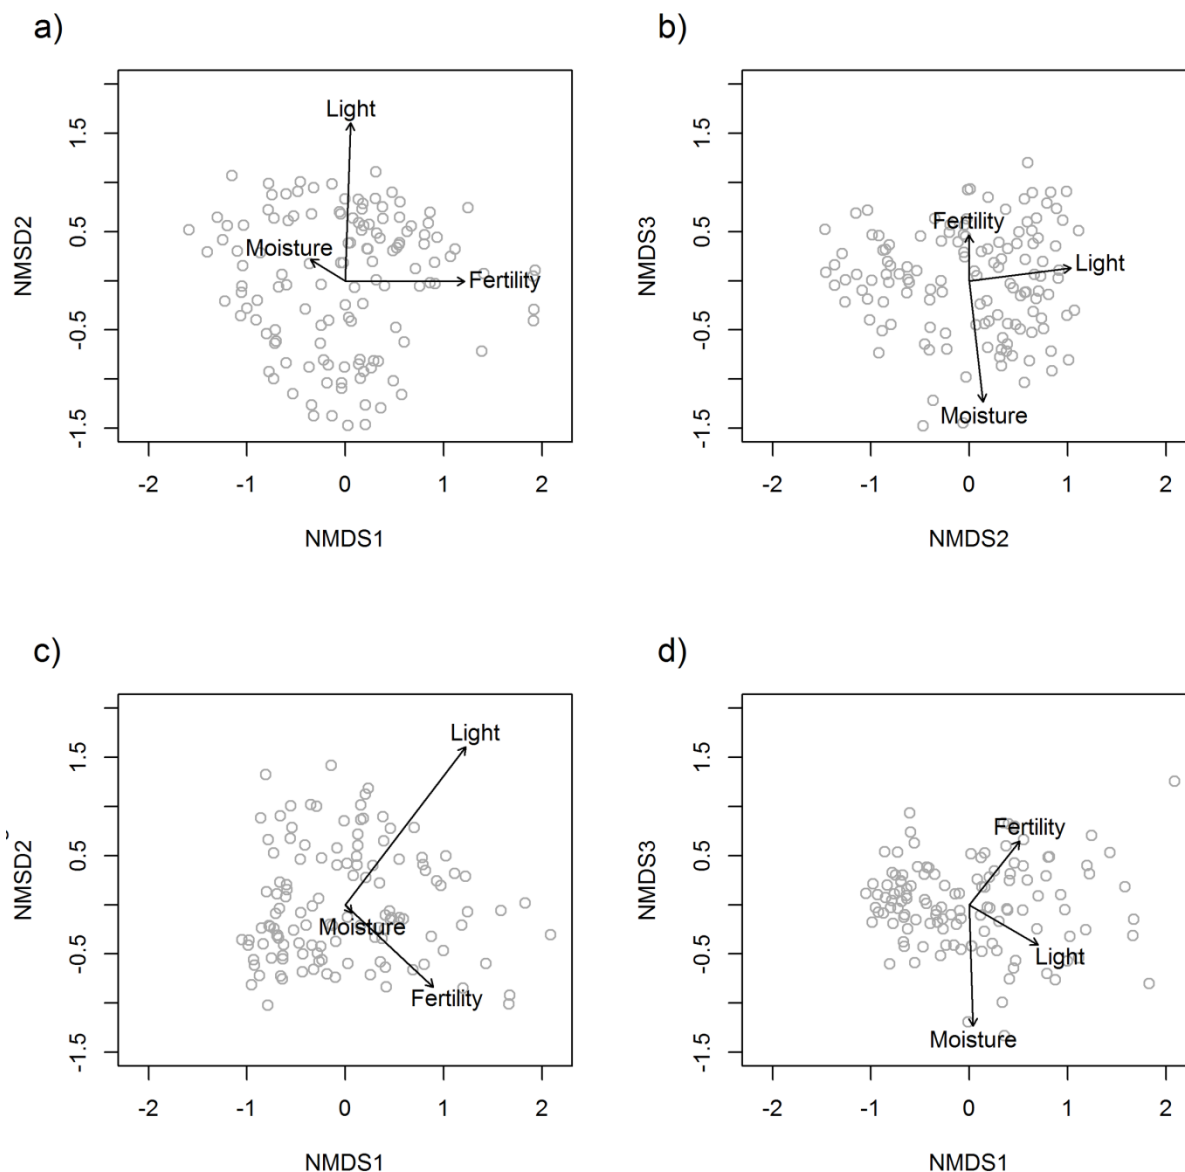

510  
511 **Figure 7:** Three dimensional NMS plots for plants with a) showing axis 2 against axis 1 and b)  
512 showing axis 3 against axis 2 and fungi with c) showing axis 2 against axis 1 and d) showing  
513 axis 3 against axis 1. The three main gradients used for selecting the 130 sites (fertility, moisture,  
514 successional stage) are overlaid as arrows (from an envfit analyses in the R package Vegan). The  
515 ordinations are based on plant species lists from the 130 sites a) & b) or macrofungi species lists  
516 from the 124 sites with more than five species c & d) and the arrows reflect soil moisture  
517 measured using a soil moisture meter, fertility measured as soil N and light measured as light

518 intensity using HOBO loggers. The ordination plots illustrate that the community composition of  
519 vascular plants and macrofungi actually reflect the main gradients the sites were selected to  
520 cover. The scatter of dots shows the variation in abiotic conditions across the 130 sites.  
521 Correlations and p-values can be seen in Appendix D.  
522

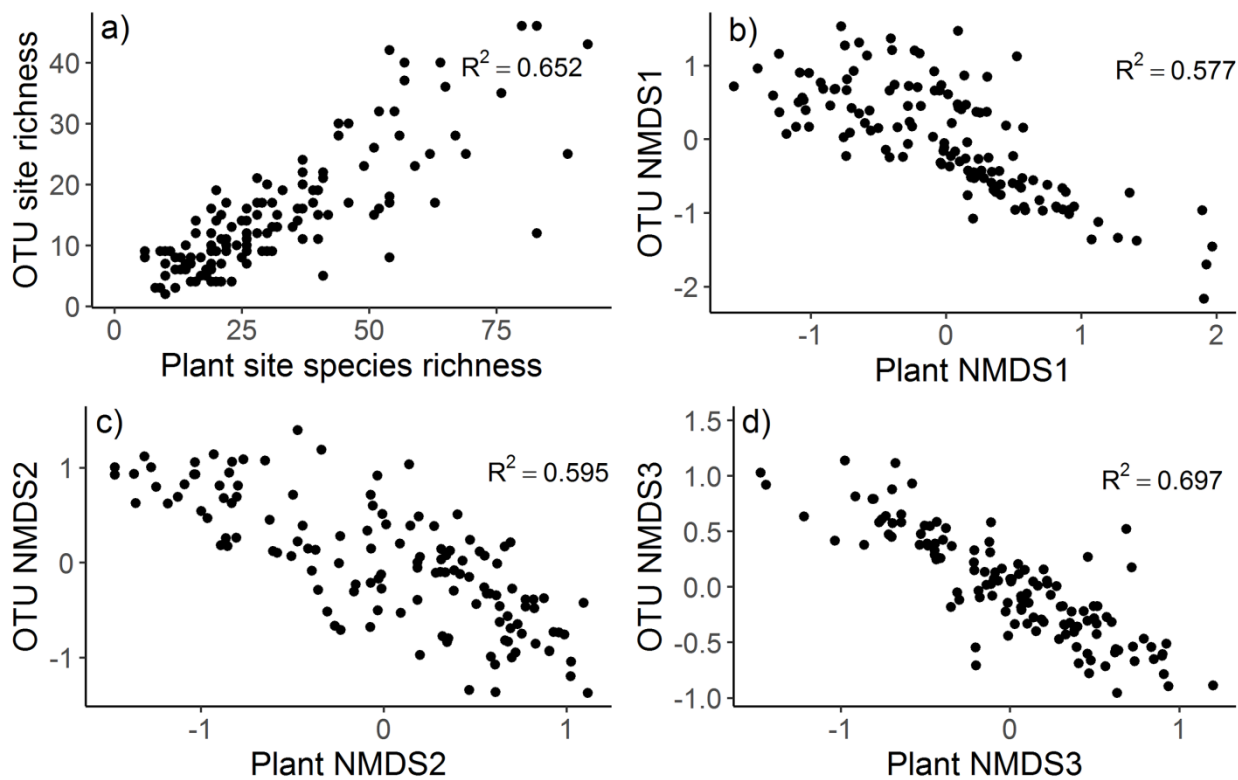

523  
524 **Figure 8:** Correlation between a) observed site plant species richness and OTU site ‘richness’ for  
525 the 130 sites (Spearman Rho:  $R^2=0.652$ ,  $S = 70457$ ,  $p\text{-value} < 0.001$ ), b-d) observed site plant  
526 community composition and OTU community composition for the 130 sites b) NMDS axes 1  
527 (Spearman Rho:  $R^2=0.576$ ,  $S = 644210$ ,  $p\text{-value} < 0.001$ ), c) NMDS axes 2 (Spearman Rho:  
528  $R^2=0.594$ ,  $S = 648480$ ,  $p\text{-value} < 0.001$ ), and d) NMDS axes 3 (Spearman Rho:  $R^2=0.697$ ,  $S =$   
529  $671850$ ,  $p\text{-value} < 0.001$ ).

## 530 References

- 531 1. Mora C, Tittensor DP, Adl S, Simpson AGB, Worm B. How many species are there on Earth and in  
532 the ocean? PLoS Biol 2011; 9:e1001127.
- 533 2. Jetz W, McPherson JM, Guralnick RP. Integrating biodiversity distribution knowledge: toward a  
534 global map of life. Trends Ecol Evol 2012; 27:151-159.
- 535 3. Isaac NJB, van Strien AJ, August TA, de Zeeuw MP, Roy DB. Statistics for citizen science:  
536 extracting signals of change from noisy ecological data. Methods in Ecology and Evolution 2014;  
537 5:1052-1060.
- 538 4. Nichols JD, Williams BK. Monitoring for conservation. Trends Ecol Evol 2006; 21:668-673.
- 539 5. Taberlet P, Coissac E, Pompanon F, Brochmann C, Willerslev E. Towards next-generation  
540 biodiversity assessment using DNA metabarcoding. Mol Ecol 2012; 21:2045-2050.
- 541 6. Thomsen PF, Willerslev E. Environmental DNA – An emerging tool in conservation for monitoring  
542 past and present biodiversity. Biological Conservation 2015; 183:4-18.
- 543 7. Porazinska DL, Giblin-Davis RM, Esquivel A, Powers TO, Sung WAY, Thomas WK.  
544 Ecometagenetics confirm high tropical rainforest nematode diversity. Mol Ecol 2010; 19:5521-  
545 5530.
- 546 8. Yoccoz NG, Brathen KA, Gielly L, Haile J, Edwards ME, Goslar T, von Stedingk H, Brysting AK,  
547 Coissac E, Pompanon F *et al.* DNA from soil mirrors plant taxonomic and growth form diversity.  
548 Mol Ecol 2012; 21:3647-3655.
- 549 9. Andersen K, Bird KL, Rasmussen M, Haile J, Breuning-Madsen H, Kjær KH, Orlando L, Gilbert  
550 MTP, Willerslev E. Meta-barcoding of ‘dirt’ DNA from soil reflects vertebrate biodiversity. Mol  
551 Ecol 2012; 21:1966-1979.
- 552 10. Taberlet P, Prud’Homme SM, Campione E, Roy J, Miquel C, Shehzad W, Gielly L, Rioux D, Choler  
553 P, Clément J-C *et al.* Soil sampling and isolation of extracellular DNA from large amount of  
554 starting material suitable for metabarcoding studies. Mol Ecol 2012; 21:1816-1820.
- 555 11. Ficetola GF, Miaud C, Pompanon F, Taberlet P. Species detection using environmental DNA from  
556 water samples. Biology Letters 2008; 4:423-425.
- 557 12. Thomsen PF, Kielgast JOS, Iversen LL, Wiuf C, Rasmussen M, Gilbert MTP, Orlando L, Willerslev E.  
558 Monitoring endangered freshwater biodiversity using environmental DNA. Mol Ecol 2012;  
559 21:2565-2573.
- 560 13. Shokralla S, Spall JL, Gibson JF, Hajibabaei M. Next-generation sequencing technologies for  
561 environmental DNA research. Mol Ecol 2012; 21:1794-1805.
- 562 14. Taberlet P, Coissac E, Hajibabaei M, Rieseberg LH. Environmental DNA. Mol Ecol 2012; 21:1789-  
563 1793.
- 564 15. Brunbjerg AK, Bruun HH, Moeslund JE, Sadler JP, Svenning J-C, Ejrnæs R. Ecospace: A unified  
565 framework for understanding variation in terrestrial biodiversity. Basic and Applied Ecology  
566 2017; 18:86-94.
- 567 16. Belyea LR, Lancaster J. Assembly rules within a contingent ecology. Oikos 1999; 86:402-416.
- 568 17. Ricklefs RE. Community diversity - relative roles of local and regional processes. Science 1987;  
569 235:167-171.
- 570 18. Horák J, Kout J, Vodka Š, Donato DC. Dead wood dependent organisms in one of the oldest  
571 protected forests of Europe: Investigating the contrasting effects of within-stand variation in a  
572 highly diversified environment. Forest Ecology and Management 2016; 363:229-236.
- 573 19. Seibold S, Bässler C, Brandl R, Gossner MM, Thorn S, Ulyshen MD, Müller J. Experimental studies  
574 of dead-wood biodiversity — a review identifying global gaps in knowledge. Biological  
575 Conservation 2015; 191:139-149.
- 576 20. Laliberté E, Zemunik G, Turner BL. Environmental filtering explains variation in plant diversity  
577 along resource gradients. Science 2014; 345:1602-1605.

- 578 21. Houseman GR, Gross KL. Linking grassland plant diversity to species pools, sorting and plant  
579 traits. *Journal of Ecology* 2011; 99:464-472.
- 580 22. Rubæk GH, Kristensen K, Olesen SE, Østergaard HS, Heckrath G. Phosphorus accumulation and  
581 spatial distribution in agricultural soils in Denmark. *Geoderma* 2013; 209–210:241-250.
- 582 23. Nygaard B, Juel A, Fredshavn JR. Ændringer i det § 3-beskyttede naturareal 1995-2014.  
583 Resultater fra Naturstyrelsens opdateringsprojekt. Aarhus Universitet, DCE – Nationalt Center  
584 for Miljø og Energi, 106 s. - Teknisk rapport fra DCE - Nationalt Center for Miljø og Energi nr. 79.  
585 <http://dce2.au.dk/pub/TR79.pdf>; 2016.
- 586 24. Arler F, Jørgensen MS, Galland D, Sørensen EM. Kampen om m<sup>2</sup> - Prioritering af fremtidens  
587 arealanvendelse i Danmark. Fonden Teknologirådet. [http://www.tekno.dk/wp-](http://www.tekno.dk/wp-content/uploads/2015/08/Prioritering-af-fremtidens-arealanvendelse-i-Danmark.pdf)  
588 [content/uploads/2015/08/Prioritering-af-fremtidens-arealanvendelse-i-Danmark.pdf](http://www.tekno.dk/wp-content/uploads/2015/08/Prioritering-af-fremtidens-arealanvendelse-i-Danmark.pdf); 2015.
- 589 25. Terrestriske Naturtyper 2004 – 2015. NOVANA. Aarhus Universitet, DCE – Nationalt Center for  
590 Miljø og Energi. [www.novana.au.dk](http://www.novana.au.dk).
- 591 26. Council Directive 92/43/EEC. On the conservation of natural habitats and of wild fauna and flora.  
592 European Commission. 1992.
- 593 27. Hill MO, Mountford JO, Roy DB, Bunce RGH. Ellenberg's indicator values for British plants :  
594 ECOFACT volume 2 : Technical Annex. Natural Environment Research Council: Centre for Ecology  
595 and Hydrology; 1999.
- 596 28. Grime JP, Hodgson JG, Hunt R. Comparative plant ecology: a functional approach to common  
597 British species. London: Unwin Hyman; 1989.
- 598 29. Ejrnæs R, Bruun HH. Gradient analysis of dry grassland vegetation in Denmark. *Journal of*  
599 *Vegetation Science* 2000; 11:573-584.
- 600 30. Lomolino MV, Riddle BR, Brown JH, Brown JH. Biogeography. In.: Sinauer Associates Sunderland,  
601 MA; 2006: 65-96.
- 602 31. Bijl Lvd, Boutrup S, Jensen PN. NOVANA. Det nationale program for overvågning af vandmiljøet  
603 og naturen. Programbeskrivelse 2007-2009 - del 2. Danmarks Miljøundersøgelser, Aarhus  
604 Universitet. Faglig rapport fra DMU nr 615 2007.
- 605 32. Schmidt P-A, Bálint M, Greshake B, Bandow C, Römbke J, Schmitt I. Illumina metabarcoding of a  
606 soil fungal community. *Soil Biology and Biochemistry* 2013; 65:128-132.
- 607 33. White N, Engeman R, Sugihara R, Krupa H. A comparison of plotless density estimators using  
608 Monte Carlo simulation on totally enumerated field data sets. *BMC Ecology* 2008; 8:6.
- 609 34. iNEXT: iNterpolation and EXTrapolation for species diversity. R package version 2.0.12 URL:  
610 <http://chao.stat.nthu.edu.tw/blog/software-download/>.
- 611 35. R Core team. R: a language and environment for statistical computing. R Foundation for  
612 Statistical Computing, Vienna, Austria; 2015.
- 613 36. Oksanen J, Blanchet FG, Kindt R, Legendre P, O'Hara RB, Simpson GL, Solymos P, Stevens MHH,  
614 Wagner H. Package 'vegan': Community Ecology Package. Version 1.17-2. [http://cran.r-](http://cran.r-project.org/web/packages/vegan/vegan.pdf)  
615 [project.org/web/packages/vegan/vegan.pdf](http://cran.r-project.org/web/packages/vegan/vegan.pdf). 2010.
- 616 37. Kraft NJB, Adler PB, Godoy O, James EC, Fuller S, Levine JM. Community assembly, coexistence  
617 and the environmental filtering metaphor. *Functional Ecology* 2015; 29:592-599.
- 618 38. Gillison AN, Brewer KRW. The use of gradient directed transects or gradsects in natural resource  
619 surveys. *Journal of Environmental Management* 1985; 20:103-127.
- 620 39. Standen V. The adequacy of collecting techniques for estimating species richness of grassland  
621 invertebrates. *Journal of Applied Ecology* 2000; 37:884-893.
- 622 40. Popic TJ, Davila YC, Wardle GM. Evaluation of common methods for sampling invertebrate  
623 pollinator assemblages: net sampling out-perform pan traps. *PLoS One* 2013; 8:e66665.

- 624 41. CaraDonna PJ, Petry WK, Brennan RM, Cunningham JL, Bronstein JL, Waser NM, Sanders NJ.  
625 Interaction rewiring and the rapid turnover of plant–pollinator networks. *Ecology Letters* 2017;  
626 20:385-394.
- 627 42. Valverde J, Gómez JM, Perfectti F. The temporal dimension in individual-based plant pollination  
628 networks. *Oikos* 2016; 125:468-479.
- 629 43. Brown SP, Veach AM, Rigdon-Huss AR, Grond K, Lickteig SK, Lothamer K, Oliver AK, Jumpponen  
630 A. Scraping the bottom of the barrel: are rare high throughput sequences artifacts? *Fungal*  
631 *Ecology* 2015; 13:221-225.
- 632 44. Kunin V, Engelbrektson A, Ochman H, Hugenholtz P. Wrinkles in the rare biosphere:  
633 pyrosequencing errors can lead to artificial inflation of diversity estimates. *Environmental*  
634 *Microbiology* 2010; 12:118-123.
- 635 45. Bálint M, Bahram M, Eren AM, Faust K, Fuhrman JA, Lindahl B, O'Hara RB, Öpik M, Sogin ML,  
636 Unterseher M *et al.* Millions of reads, thousands of taxa: microbial community structure and  
637 associations analyzed via marker genes. *FEMS Microbiology Reviews* 2016; 40:686-700.

638
