1 **A systematic survey of regional multitaxon biodiversity: evaluating**  
2 **strategies and coverage**

3 **Ane Kirstine Brunbjerg<sup>1\*</sup>, Hans Henrik Bruun<sup>2</sup>, Lars Brøndum<sup>3</sup>, Aimée T.**  
4 **Classen<sup>4,5</sup>, Lars Dalby<sup>1</sup>, Kåre Fog<sup>6</sup>, Tobias G. Frøslev<sup>7</sup>, Irina Goldberg<sup>2</sup>, Anders**  
5 **Johannes Hansen<sup>7</sup>, Morten D.D. Hansen<sup>3</sup>, Toke T. Høye<sup>1,8</sup>, Anders A. Illum<sup>5</sup>,**  
6 **Thomas Læssøe<sup>2</sup>, Sarah Siu Tze Mak<sup>7</sup>, Gregory S. Newman<sup>5</sup>, Ida Broman Nielsen<sup>7</sup>,**  
7 **Carlotta Pietroni<sup>7</sup>, Lars Skipper<sup>3</sup>, Ulrik Söchting<sup>2</sup>, Rasmus Ejrnæs<sup>1</sup>**

8 <sup>1</sup> *Section for Biodiversity & Conservation, Department of Bioscience, Aarhus University, DK-*  
9 *8410 Rønde, Denmark (present address)*

10 <sup>2</sup> *Section for Ecology and Evolution, Department of Biology, University of Copenhagen, DK-*  
11 *2100 Copenhagen, Denmark / Natural History Museum of Denmark, Universitetsparken 15,*  
12 *University of Copenhagen, DK-2100 Copenhagen, Denmark*

13 <sup>3</sup> *Natural History Museum Aarhus, DK-8000 Aarhus C, Denmark*

14 <sup>4</sup> *Rubenstein School of Environment and Natural Resources, University of Vermont, Burlington,*  
15 *VT 05405, USA,*

16 <sup>5</sup> *Centre for Macroecology, Evolution and Climate, Natural History Museum of Denmark,*  
17 *University of Copenhagen, DK-1350 Copenhagen, Denmark.*

18 <sup>6</sup> *Hesselholm 107, DK-3670 Veksø, Denmark*

19 <sup>7</sup> *Centre for GeoGenetics, GLOBE Institute, University of Copenhagen, DK-2100 Copenhagen,*  
20 *Denmark*

21 <sup>8</sup> *Arctic Research Centre, Aarhus University, Ny Munkegade 114, building 1540, DK-8000*  
22 *Aarhus C, Denmark*

23

24 \* Corresponding author: Tel.: +45 87158865, E-mail address: akb@bios.au.dk  
25 E-mail-addresses (co-authors): AKB: akb@bios.au.dk, HHB: hhbruun@bio.ku.dk, LB:  
26 lars@nathist.dk, ATC: atclassen@gmail.com, LD: lars@bios.au.dk, KF: kaarefog@teliamail.dk,  
27 TGF: tobiasgf@bio.ku.dk, IG: irina.goldberg@gmail.com, AJH: ajhansen@bio.ku.dk , MDDH:  
28 mortendd@molslab.dk, TTH: tth@bios.au.dk, AAI: andersaillum@snm.ku.dk, TL:  
29 thomsal@bio.ku.dk, SSTM: s.mak@snm.ku.dk, GSN: gsnewm@gmail.com, IBN:  
30 ida.nielsen@bio.ku.dk, CP: carlotta.pietroni@snm.ku.dk, LS: lars.skipper@get2net.dk, US:  
31 ulriks@bio.ku.dk, RE: rasmus@bios.au.dk

32 **Abstract**

33 **Background:** In light of the biodiversity crisis and our limited ability to explain variation in  
34 biodiversity, tools to quantify spatial and temporal variation in biodiversity and its underlying  
35 drivers are critically needed. Inspired by the recently published ecospace framework, we  
36 developed and tested a protocol for environmental and biotic mapping that is scalable to habitats,  
37 ecosystems and biomes. We selected study sites (40×40m) across Denmark using stratified  
38 random sampling along the major environmental gradients underlying biotic variation. Using  
39 standardized methods, we collected site species data on vascular plants, bryophytes, macrofungi,  
40 lichens, gastropods and arthropods. To evaluate sampling efficiency, we calculated regional  
41 coverage (relative to the known species number per taxonomic group), and site scale coverage  
42 (i.e., sample completeness per taxonomic group at each site). To extend taxonomic coverage to  
43 organisms that are difficult to sample by classical inventories (e.g., nematodes and non-fruiting  
44 fungi), we collected soil for metabarcoding. Finally, to assess site conditions, we mapped abiotic  
45 conditions, biotic resources and habitat continuity.

46 **Results:** Despite the 130 study sites only covering a minute fraction (0.0005 %) of the total  
47 Danish terrestrial area, we found 1774 species of macrofungi (54% of the Danish fungal species  
48 pool), 663 vascular plant species (42%), 254 bryophyte species (41%) and 200 lichen species  
49 (19%). For arthropods, we observed 330 spider species (58%), 123 carabid beetle species (37%)  
50 and 99 hoverfly species (33%). Overall, sample coverage was remarkably high across taxonomic  
51 groups and sufficient to capture substantial spatial variation in biodiversity across Denmark. This  
52 inventory is unprecedented in detail and resulted in the discovery of 143 species with no  
53 previous record for Denmark. Comparison between plant OTUs detected in soil DNA and  
54 observed plant species confirmed the usefulness of carefully curated environmental DNA-data.

55 Species richness did not correlate well among taxa suggesting differential and complex biotic  
56 responses to environmental variation.

57 **Conclusions:** We successfully and adequately sampled a wide range of mega-diverse taxa along  
58 key environmental gradients across a large region using an approach that includes multi-taxon  
59 biodiversity assessment and ecospace mapping. Our approach is applicable to assessments of  
60 biodiversity in other regions and biomes.

61 **Keywords:** Abiotic gradients, Biotic factors, Continuity, Denmark, Disturbance, eDNA,  
62 Moisture, Productivity

## 63 **Background**

64 The vast number of species on Earth have yet to be described, challenging our understanding of  
65 biodiversity [1]. For a deeper understanding of what determines the distribution of species across  
66 the planet, comprehensive data on species occurrence and environmental conditions are required.  
67 While some progress has been made in understanding the distribution of biodiversity at coarse  
68 spatial resolution, our knowledge of biodiversity at high spatial resolution is deficient [2]. In this  
69 study, we consider biodiversity as the richness and turnover of taxonomic units, whether species  
70 or operational taxonomic units (OTUs) derived by eDNA (environmental DNA) metabarcoding.  
71 While progress has been made in the interpretation and prediction of richness and turnover of  
72 vascular plants and vertebrates, various types of bias, e.g. temporal, spatial, and taxonomic bias  
73 [3], have constrained similar advances for less well-known, but mega-diverse groups such as  
74 fungi and insects [1]. As a result, conservation management is typically based on biodiversity  
75 data from a non-random subset of taxa [4].

76 Recent developments in molecular techniques – in particular the extraction and sequencing  
77 of eDNA – hold the promise of more time-efficient sampling and identification of species [5, 6].  
78 Further, eDNA enables the exploration of communities and organisms not easily recorded by  
79 traditional biodiversity assessment, such as soil-dwelling nematodes [7]. In fact, PCR-based  
80 methods combined with DNA sequencing have already provided valuable insight into the  
81 taxonomic diversity within complex environmental samples, such as soil [8-10] and water [e.g.  
82 11, 12]. Due to the ongoing rapid development in DNA sequencing technologies, with the  
83 emergence of next generation sequencing (NGS) techniques – generating billions of DNA  
84 sequences [13] – an environmental sample could now be analyzed to a molecular depth that  
85 gives an almost exhaustive picture of the species composition at the site of collection. Despite

86 this potential, rigorous assessments with complete taxonomic coverage from eDNA samples are  
87 still missing [6, 12, 14]. To assess the suitability and potential of eDNA data in complementing –  
88 or even replacing – traditional field survey data, tests on comprehensive data sets are needed.

89 Undertaking an ambitious biodiversity field study across a wide geographical space comes  
90 with major logistical and methodological challenges. It is not clear what environmental gradients  
91 structure biodiversity across the tree of life and for most taxa standardized field protocols to  
92 sample species occurrences are non-existent. The recently developed ecospace framework  
93 suggests that biodiversity varies in relation to its position along environmental gradients  
94 (position), the availability of biotic resources, such as organic matter and structures e.g. trees for  
95 epiphytes (expansion), and spatio-temporal extent of biotopes (continuity) [15]. Environmental  
96 conditions and local processes can be a template shaping local biodiversity (e.g. through  
97 environmental filtering) [16, 17]. This template is highlighted by the ecospace position of  
98 sampled biotopes in abiotic environmental space. In addition to the physico-chemical conditions  
99 shaping abiotic gradients – particularly important to autotrophic organisms – the presence and  
100 abundance of specific biological resources, crucial to heterotrophic organisms, such as specialist  
101 herbivores, detritivores and saproxylic species are likely important and thus should be considered  
102 [18]. The quantification of biotic resources and structures, e.g. dead wood, dung and carcasses, is  
103 not often included in community studies, despite the limited knowledge in the area [15, 19]  
104 speaks for further studies. Spatial and temporal processes at regional extent, such as extinction,  
105 speciation and migration, shape species pools and thereby set the limits to local richness and  
106 species composition [16, 17, 20]. In order to improve our understanding of biodiversity patterns,  
107 local and regional factors should be considered concurrently [17, 21].

108        In this study, we used the ecospace framework to develop a comprehensive protocol for  
109        large-scale mapping of variation in biodiversity and to evaluate the efficacy of ecospace in  
110        capturing environmental variation across Denmark. The protocol development and evaluation  
111        was carried out as part of a research project (called *Biowide*). The project aimed to cover all of  
112        the major environmental gradients, including natural variation in moisture, soil fertility and  
113        succession, as well as habitats under cultivation. Within this environmental space, we performed  
114        a systematic and comprehensive sampling of the environment and biodiversity. We combined  
115        traditional species observation and identification with modern methods of biodiversity mapping  
116        in the form of massive parallel sequencing of eDNA extracted from soil samples.

## 117 **Methods**

### 118 **Study area and site selection**

119 We aimed to characterize biodiversity across the country of Denmark (Fig. 1a) – a lowland area  
120 of 42,934 km<sup>2</sup> and an elevational range of 0-200 meters above sea level. While there are some  
121 limestone and chalk outcrops, there is no exposed bedrock in the investigated area. Soil texture  
122 ranges from coarse sands to heavy clay and organic soils of various origins [22]. Land use is  
123 dominated by arable land (61 %), most of which is in annual rotation, while forests are mostly  
124 plantations established during the 19<sup>th</sup> and 20<sup>th</sup> centuries. Scrubs cover approximately 17 %,  
125 natural and semi-natural terrestrial habitats some 10 %, and freshwater lakes and streams 2 %.  
126 The remaining 10 % is made up of urban areas and infrastructure [23, 24].

127 When selecting sites, we considered major environmental gradients, the potential size of the  
128 sampling units (sites), as well as practicalities of sampling across the large geographical space  
129 within the same season. The sites were 40 × 40 m which was a compromise between within-site  
130 homogeneity and the representativeness of a particular habitat type. We stratified site selection  
131 according to the identified major environmental gradients, including the intensity of human land  
132 use. We measured 30 sites that were cultivated habitats and 100 sites that were natural and semi-  
133 natural habitats. This balance between natural and cultivated habitat was chosen, because we  
134 expected cultivated habitats to have shorter environmental gradients. The cultivated subset  
135 represented major land-use categories and the natural subset was stratified across natural  
136 gradients in soil fertility, soil moisture, and successional stage from sparsely vegetated to closed  
137 canopy forest, (Appendix A). We deliberately excluded linear features, such as hedgerows and  
138 road verges, urban areas with predominantly exotic plants as well as saline and aquatic habitats,  
139 but included temporarily inundated heath, dune depressions and wet mires.



140 The final set of 25 sampling classes consisted of six cultivated habitat types; three types of  
141 fields (rotational, leys, and oldfield) and three types of plantations (beech, oak, and spruce). 18  
142 natural classes consisted of all factorial combinations of natural soil fertility (fertile or infertile),  
143 moisture (dry, moist, or wet), and successional stage (low vegetation with bare soil, closed  
144 herb/scrub, or forest) (Appendix A). Finally, we included a class of perceived hotspots for  
145 species richness [25] in Denmark. These sites were selected subjectively by performing a public  
146 poll among active natural history volunteers in the Danish nature conservation and nature  
147 management societies. The 25 classes were replicated in each of five geographical regions within  
148 Denmark (Fig. 1a). The result was 130 sites with 18 natural, 6 cultivated, and two perceived  
149 species richness hotspot sites evenly distributed across each of five geographic regions of  
150 Denmark (Table 1). For logistical reasons, we did not place any sites on Bornholm although we  
151 acknowledge that this island is geologically different than the rest of Denmark.

152 For the 18 natural habitat classes, site selection through stratified random sampling was  
153 guided by a large nation-wide dataset of vegetation plots in semi-natural habitats distributed  
154 across the entire country ( $n = 96,400$  plots of  $78.5 \text{ m}^2$  each, [www.naturdata.dk](http://www.naturdata.dk)) from a national  
155 monitoring and mapping project [26] and in accordance with the EU Habitats Directive [27]. We  
156 used environmental conditions computed from plant indicator values to select candidate sites for  
157 each class. First, we calculated plot mean values for Ellenberg indicator values based on vascular  
158 plants species lists [28] and Grime CSR-strategy allocations of recorded plants [29], the latter  
159 were recoded to numeric values following Ejrnæs & Bruun [30]. We excluded saline and  
160 artificially fertilized habitats by excluding plots with Ellenberg S > 1 or Ellenberg N > 6. We  
161 then defined stratification categories as: fertile (Ellenberg N 3.5-6.0), infertile (Ellenberg N <  
162 3.5), dry (Ellenberg F < 5.5), moist (Ellenberg F 5.5-7.0), wet (Ellenberg F > 7.0), early

163 succession (Grime  $R > 4$  and Ellenberg  $L > 7$  or  $> 10\%$  of annual plants), late succession  
164 (mapped as forest), mid succession (remaining sites).

165 To reduce transport time and costs, all 26 sites within each region were grouped into three  
166 geographic clusters (Fig. 1a). The nested sampling design allowed us to take spatially structured  
167 species distributions into account [31]. The procedure for site selection involved the following  
168 steps:

- 169 1) Designation of three geographic clusters within each region with the aim to cover all  
170 natural classes while a) keeping the cluster area below  $200 \text{ km}^2$  and b) ensuring high  
171 between-cluster dispersion in order to represent the geographic range of the region. In  
172 practice, species richness hotspots were chosen first, then clusters were placed with  
173 reference to the highest ranking hotspots and in areas with a wide range of classes  
174 represented in the national vegetation plot data [32].
- 175 2) Representing the remaining 24 classes in each region by selecting 8-9 potential sites in  
176 each cluster. Sites representing natural classes were selected from vegetation plot data.  
177 Cultivated classes were assumed omnipresent and used as buffers in the process of  
178 completing the non-trivial task of finding all classes within each of three cluster areas of  
179  $< 200 \text{ km}^2$  in each region.
- 180 3) Negotiating with land owners and, in case of disagreement, replacing the preferred site  
181 with an alternative site from the same class.

182 After each of the 130 sites were selected using available data, we established each  $40 \times 40 \text{ m}$   
183 site in a subjectively selected homogenous area that accounted for topography and vegetation  
184 structure. Each site was divided into four  $20 \times 20 \text{ m}$  quadrants, and from the center of each

185 quadrant a 5 m radius circle (called a plot) was used as a sub-unit for data collection to  
186 supplement the data collected at site level (40 × 40 m) (Fig. 1b).

### 187 **Collection of biodiversity data**

188 For each of the 130 sites, we aimed at making an unbiased and representative assessment of  
189 multi-taxon species richness. Data on vascular plants, bryophytes, lichens, macrofungi,  
190 arthropods and gastropods were collected using standard field inventory methods (Appendix B).  
191 For vascular plants, bryophytes and gastropods, we collected exhaustive species lists. For the  
192 remaining taxonomic groups that are more demanding to find, catch, and identify, we aimed at  
193 collecting a reproducible and unbiased sample through a standardized level of effort (typically  
194 one hour). Multiple substrates (soil, herbaceous debris, wood, stone surfaces and bark of trees up  
195 to 2 m) were carefully searched for lichens and macrofungi at each site. For fungi, we visited  
196 each site twice during the main fruiting season in 2014 – in August and early November – and  
197 once during the main fruiting season in 2015 – between late August and early October.  
198 Specimens that were not possible to identify with certainty in the field were sampled and, when  
199 possible, identified in the laboratory. For arthropod sampling, a standard set of pitfall traps  
200 (including meat-baited and dung-baited traps), yellow Mörické pan traps and Malaise traps were  
201 operated during a fixed period of the year. In addition, we used active search and collection  
202 methods, including sweep netting and beating as well as expert searches for plant galls, miners  
203 and gastropods. Finally, we heat-extracted collembolas and oribatid mites from soil cores. Due to  
204 the limited size of the sites relative to the mobility of mammals, birds, reptiles and amphibians,  
205 data on these groups were not recorded. Records of arthropods were entered in <https://www.naturbasen.dk>.  
206 Records of fungi were entered in <https://svampe.databasesen.org/>. All species  
207 occurrence data and environmental data has been made available at the project home page

208 <http://bios.au.dk/om-instituttet/organisation/biodiversitet/projekter/biowide/>. Species data will be  
209 made available for GBIF ([www.gbif.org](http://www.gbif.org)) through the above-mentioned web portals. Specimens  
210 are stored at the Natural History Museum Aarhus (fungal specimens at the fungarium at the  
211 Natural History Museum of Denmark). For further details on the methods used for collection of  
212 biodiversity data see Appendix B.

### 213 **Collection of eDNA data**

214 We used soil samples collected from all 130 sites for the eDNA inventory. At each site, we  
215 sampled 81 soil cores in a  $9 \times 9$  grid covering the entire  $40 \text{ m} \times 40 \text{ m}$  plot and pooled the  
216 collected samples after removal of coarse litter. We homogenized the soil by mixing with a  
217 mixing paddle mounted on a drilling machine. A subsample of soil was sampled from the  
218 homogenized sample and DNA was extracted for marker gene amplification and sequencing  
219 [14]. We chose the MiSeq platform by Illumina for DNA sequencing. MiSeq is adapted to  
220 amplicon sequencing [33]. For further details on methods for eDNA data generation and  
221 considerations on eDNA species richness and community composition measures see Appendix  
222 B.

### 223 **Site environmental data**

224 We have followed the suggestion in Brunbjerg et al. [15] to describe the fundamental  
225 requirements for biodiversity in terms of the ecospace (position, expansion and spatio-temporal  
226 continuity of the biotope).

#### 227 ***Position***

228 To assess the environmental variation across the 130 sites, we measured a core set of site factors  
229 that described the abiotic conditions at each site. Environmental recordings and estimates

230 included soil pH, total soil carbon (C, g/m<sup>2</sup>), total soil nitrogen (N, g/m<sup>2</sup>) and total soil  
231 phosphorus (P, g/m<sup>2</sup>), soil moisture (% volumetric water content), leaf CNP (%), soil surface  
232 temperature (°C) and humidity (vapour pressure deficit), air temperature (°C), light intensity  
233 (Lux), and boulder density. For further details on methods used to collect abiotic data see  
234 Appendix B.

### 235 *Expansion*

236 We collected measurements that represent the expansion or biotic resources which some species  
237 consume and the organic and inorganic structures which some species use as habitat. Although  
238 many invertebrates are associated with other animals, for practical reasons, we restricted our  
239 quantification of biotic resources to the variation in live and dead plant tissue, including dung.  
240 We measured litter mass (g/m<sup>2</sup>), plant species richness, vegetation height (of herb layer, cm),  
241 cover of bare soil (%), bryophyte cover (%) and lichen cover (%), dead wood volume (m<sup>3</sup>/site),  
242 dominant herbs, the abundance of woody species, the number of woody plant individuals, flower  
243 density (basic distance abundance estimate, [34]), density of dung (basic distance abundance  
244 estimate), number of carcasses, fine woody debris density (basic distance abundance estimate),  
245 ant nest density (basic distance abundance estimate), and water puddle density (basic distance  
246 abundance estimate). For further details on methods used to collect expansion data see Appendix  
247 B.

### 248 *Mapping of temporal and spatial continuity*

249 For each site, we inspected a temporal sequence of aerial photos (from 1945 to 2014) and  
250 historical maps (1842-1945) starting with the most recent photo taken. We defined temporal  
251 continuity as the number of years since the most recent major documented land use change. The  
252 year in which a change was identified was recorded as a ‘break in continuity’. To estimate spatial

253 continuity, we used ArcGIS to construct four buffers for each site (500 m, 1000 m, 2000 m, 5000  
254 m). Within each buffer we estimated the amount of habitat similar to the site focal habitat by  
255 visual inspection of aerial photos with overlays representing nation-wide mapping of semi-  
256 natural habitat. For further details on methods for collection of continuity data see Appendix B.

## 257 **Analyses**

258 To illustrate the coverage of the three main gradients (moisture, fertility, and successional stage)  
259 spanned by the 130 sites, Ellenberg mean site values (mean of mean Ellenberg values for the  
260 four 5m radius quadrats within each site) for soil moisture (Ellenberg F), soil nutrients  
261 (Ellenberg N) and light conditions (Ellenberg L) were plotted relative to Ellenberg F, N and L  
262 values for a reference data set of 5 m radius vegetation quadrats (47202 from agricultural, semi-  
263 natural and natural open vegetation and 12014 from forests ([www.naturdata.dk](http://www.naturdata.dk)) [26]. Mean  
264 Ellenberg values were only calculated for quadrats with more than five species and 95 percentile  
265 convex hull polygons were drawn for the reference data set as well as the Biowide data set.

266 We assessed the coverage for each taxonomic group across sites as well as within each site for  
267 spiders, harvestmen, and insect orders represented by at minimum of 75 species, for which we  
268 had abundance data by comparing the number of species found to the estimated species richness  
269 of the sample using rarefaction in the iNEXT R-package [35].

270 To further evaluate the turnover component of biodiversity and how well we covered the  
271 environmental gradient for our inventory, we related community composition to the measured  
272 environmental variables (abiotic and biotic) based on a Nonmetric Multidimensional Scaling  
273 (NMDS) analyses in R v. 3.2.3 [36] using the vegan R-package [37] and the plant species  $\times$  site  
274 matrix as well as the macrofungi species  $\times$  site matrix. Abiotic and biotic variables were  
275 correlated with ordination axes to facilitate interpretation.

276 To illustrate and substantiate the adequacy of the eDNA sampling protocol and subsequent  
277 laboratory protocols, we correlated basic biodiversity measures of community composition  
278 (NMDS axes) and richness for plant eDNA (ITS2 marker region) with the same measures for our  
279 observed plant data (see Appendix B for detailed methods).

## 280 **Results**

281 The 130 sites were distributed in 15 clusters nested within five regions across Denmark (Fig. 1a).  
282 The measured variables differed according to the initial stratification of sites based on simple  
283 indicators (Table 1, Fig. 2a, b, ranges of measured variables in Appendix C). Managed sites  
284 (plantations and agricultural fields) revealed little variation in soil moisture (Fig. 2b). The  
285 species richness hotspots spanned the full variation of natural sites regarding fertility, moisture  
286 and successional stage (Fig. 2b).

287 The selected 130 sites covered the main gradients reflected by a huge reference dataset from a  
288 national monitoring program (Fig. 3) as judged from a vegetation-based calibration of site  
289 conditions regarding moisture, fertility and succession (light intensity). Biowide data seemed to  
290 increase the upper range of the fertility gradient, which can be explained by the inclusion in  
291 Biowide of rotational fields that were not included in reference data (Fig. 2b, 3).

292 The environmental expansion of ecospace, which was measured as the amount and  
293 differentiation of organic carbon sources, varied among habitat types with high litter mass in tree  
294 plantations and late successional habitats, high plant species richness in early and mid-  
295 successional habitats, high dung density in open habitats (early successional and fields) and high  
296 amounts of dead wood in late successional habitats (Fig. 4). Spatial and temporal continuity  
297 varied for the 130 sites with less spatial continuity at larger buffer sizes (Appendix D). The  
298 number of species found per site differed with taxonomic group with the highest number for  
299 macrofungi and lowest for bryophytes and lichens (Appendix E).

300 We collected 1774 species of macrofungi (corresponding to 54 % of the number of  
301 macrofungi recorded in Denmark), 200 lichens (19 %), 663 vascular plants (42 %) and 254  
302 bryophytes (41 %) during the study period. We collected 75 species of gastropods (75 %), 330



303 spiders (58 %), 99 hoverflies (33 %), 123 carabid beetles (37 %) and 203 gallers and miners  
304 species (21 %). For all groups except macrofungi, the number of species found was higher in  
305 natural (n = 90) than in cultivated (n = 40) sites, but across taxonomic groups, plantations and  
306 agricultural fields harbored unique species – plantations were particularly important in harboring  
307 unique species of macrofungi (Table 2). The taxonomic sample coverage calculated by  
308 rarefaction within the 130 sites was high overall (range: 0.86-0.99), but highest for gastropods  
309 and spiders and lowest for gallers and miners (Table 2).

310 Data from the fungal eDNA community matrix was mapped to the Darwin Core data standard  
311 (<http://rs.tdwg.org/dwc/>) and wrapped in a DwC archive for publication to the Global  
312 Biodiversity Information Facility. The 'dataGeneralizations' field was used to indicate the  
313 identity of OTUs towards the UNITE species hypothesis concept [38], Sampling sites were  
314 included as WKT polygons in the 'footprintWKT' field and sampling site names were included in  
315 the 'eventID' field. The representative sequences (OTUs) were included using the GGBN  
316 amplification extension. The dataset is available from gbif.org (<https://doi.org/10.15468/nesbvx>)

317 The inventory was unprecedented in detail for Denmark and possibly for any region of the  
318 same size globally and resulted in a total of 110 new macrofungi, 1 new lichen and 32 new  
319 invertebrate species (of which 12 were gallers and miners and 3 spiders) that had not previously  
320 been documented in Denmark (Table 2).

321 Turnover of plant communities among sites was adequately described by the NMDS  
322 ordination, which accounted for 81 % of the variation in plant species composition (when  
323 correlating the original distance matrix with distances in ordination space, 3-dimensional, final  
324 stress = 0.102) of which 26%, 26%, and 11% could be attributed to axis 1, 2 and 3, respectively.  
325 Likewise for macrofungal communities the NMDS ordination accounted for 72 % of the

326 variation in species composition (3-dimensional, final stress = 0.146) of which 35%, 21% and  
327 14% could be attributed to axis 1, 2, and 3, respectively. The major gradients in plant species  
328 composition of the 130 sites correlated strongly with soil fertility (NMDS axis 1 strong  
329 correlation with soil N, P and pH), successional stage (NMDS axis 2 strong correlation with light  
330 intensity and opposite correlation with litter mass and number of large trees) and soil moisture  
331 (NMDS axis 3 strong correlation with measured soil moisture), reflecting the gradients that the  
332 sites were selected to cover (Fig. 5, see correlation matrix for the rest of the environmental  
333 variables in Appendix F). Macrofungal species composition showed the same gradients, however  
334 succession and fertility swapped with succession as primary gradient (NMDS1) and fertility as  
335 secondary gradient (NMDS2). NMDS axis 3 reproduced a strong correlation with soil moisture.

336 Spearman Rho correlations between observational plant species richness and eDNA OTU  
337 'richness' as well as observational plant community composition (as represented by NMDS axes  
338 1-3) and eDNA OTU composition were both strong and confirmative for a recovery of plant  
339 diversity by metabarcoding of soil-derived DNA ( $R^2_{\text{richness}} = 0.652$ ,  $R^2_{\text{composition}} = 0.577-697$ , Fig.  
340 6). Plant diversity (richness and composition) inferred from soil derived DNA thus resembled  
341 similar metrics derived from direct observation of plant communities, which has also been  
342 investigated in more detail in [39]. We found cross-correlations among species richness of  
343 different taxonomic groups to be predominantly positive or non-significant (Fig. 7). Negative  
344 correlations typically involved insect taxa like Diptera, Lepidoptera, and Orthoptera and e.g.  
345 Fungi.

346

## 347 Discussion

348 Using ecospace as a conceptual framework [15], we developed a protocol for mapping terrestrial  
349 biodiversity across Denmark represented by numerous, mega-diverse taxa. Across the 130  
350 surveyed sites, covering a tiny fraction (0.0005 %) of the total land area of Denmark, we  
351 observed approximately 5500 species, of which 143 represented new species records for the  
352 country. Our stratification procedures allowed us to cover the local and national environmental  
353 variation across Denmark using only 130 sites of 40 m × 40 m each and provided a good across  
354 and within site coverage of diverse groups of invertebrates and fungi. Finally, the study  
355 demonstrates that eDNA data, once properly curated [39], can be used as an important  
356 supplement to classical biodiversity surveys.

357 Since, environmental filtering is an important process in community assembly [40], the most  
358 obvious design principle for a biodiversity inventory is to stratify sampling according to major  
359 abiotic and biotic environmental gradients [e.g. 41]. In strongly human-dominated landscapes,  
360 such stratification should incorporate both cultivated and non-cultivated areas and since  
361 environmental gradients are often narrower in cultivated areas, this needs to be taken into  
362 account. We found a close correspondence between the variation in average Ellenberg values at  
363 our sites and those extracted from a very large vegetation database comprising vascular plant  
364 species lists from a national monitoring program. This indicates that we managed to cover the  
365 main environmental gradients found across Denmark. Turnover of plant and macrofungi  
366 communities was significantly linked to moisture, light and fertility and allows us to generalize  
367 relationships between environment and biodiversity derived from local measurements to a large  
368 spatial extent. We note that the use of stratified random sampling implies a biased representation  
369 of rare and common environmental conditions. On the other hand, a completely random

370 sampling would have led to limited representation of natural biotopes and their disproportionate  
371 contribution to the total biodiversity may have been missed.

372 While the ecospace framework helped structure our sampling, it also proved challenging with  
373 respect to trade-offs between site size and homogeneity (related to ecospace position), methods  
374 to quantify biotic resources (assessing ecospace expansion) and definitions of temporal and  
375 spatial continuity. Ideally, abiotic and biotic conditions should be homogenous across a site in  
376 order to ensure that site measurements reflect the abiotic position and biotic expansion [15]. A  
377 smaller area would be more likely to be homogenous, but would be less representative. Across  
378 long environmental gradients, homogeneity and representativeness may also vary among for  
379 example, grassland, heathland, and forest. Similarly, while counting the number of different  
380 plant species is easy, accounting for the relative contribution of each species to total biomass and  
381 measuring the availability of different biotic resources such as dead wood, woody debris, litter,  
382 dung, flowers and seeds is much harder. Finally, spatial and temporal continuity is hard to  
383 quantify due to data limitations and because past soil tillage, fertilization, or other land  
384 management or disturbance regimes have not been recorded and must be inferred indirectly. In  
385 addition, an unambiguous definition of continuity breaks is impossible given that most land use  
386 changes and derived community turnover occur gradually over time. We estimated spatial  
387 continuity using broad habitat classes at a range of scales (500 m, 1000 m, 2000 m, 5000 m)  
388 acknowledging that the dependency on spatio-temporal continuity depend on the mobility, life  
389 history and habitat specificity of different species. Our estimate of temporal continuity were also  
390 limited by the availability of aerial photographs and maps, which while not perfect, is good  
391 relative to other parts of the world. Despite these constraints, our estimates of spatial and

392 temporal continuity varied among sites and were uncorrelated, which allowed us to statistically  
393 test for their relative roles.

394 We aimed at equal sampling effort per site in terms of trapping and searching time. However,  
395 this was challenged by an array of practicalities. The preferred species sampling methods varied  
396 among taxonomic groups [42, 43] and despite our application of a suite of methods, including  
397 passive sampling in pitfall traps and Malaise traps, baited traps, soil core sampling and active  
398 search, our taxonomic coverage was still incomplete (e.g. aphids, phorid flies and other species-  
399 rich groups living in the canopy are inevitably under-sampled). Our budget also forced us to be  
400 selective with the morphology-based identification of the most difficult species groups, in  
401 particular within Hymenoptera and Diptera. Among identified groups, across-site sample  
402 coverage was consistently high ( $>0.86$ ) and typically close to 1, which indicates that very few  
403 unseen species remain to be recorded in each community. Invertebrate sampling and  
404 identification is extremely time consuming and relies on rare taxonomic expertise. The within  
405 site sample coverage could only be calculated for spiders and insect orders for which abundance  
406 data were available. Median values of within site sample coverage were also consistently above  
407 0.5, which we consider adequate for cross-site comparisons. We spent more than half of the  
408 inventory budget on invertebrate sampling and identification. Invertebrates constitute by far the  
409 largest fraction of the total biota and, for many species, the adult life stage is short-lived, highly  
410 mobile, and the range of active species varies with season [44, 45]. Trapping also implies a  
411 certain risk of suboptimal placement or vandalism by visiting humans, domestic livestock or wild  
412 scavengers. The resulting number of invertebrate species per site is relatively high and revealed a  
413 considerable variation, which gives ample opportunity for comparative analyses. The high  
414 number of new species for Denmark, particularly macrofungi, can most likely be attributed to the

415 effort, but also to the inclusion of habitat types that would otherwise have been avoided or  
416 overlooked during opportunistic field surveys [3].

417 Although methods for DNA extraction, amplification, sequencing and bioinformatics  
418 processing are continuously improved and may lead to better biodiversity metrics from  
419 environmental samples, collecting representative samples from larger areas with unevenly  
420 distributed species remains a challenge. We pooled and homogenized large amounts of soil,  
421 followed by extraction of intracellular as well as extracellular DNA, from a large subsample, to  
422 maximize diversity coverage within a manageable manual workload. Biodiversity metrics based  
423 on plant DNA were correlated to the same metrics for observational plant data. This indicates  
424 that the procedure for sampling, DNA extraction and amplification can be assumed to be  
425 adequate for achieving amplicon data to quantify variation in biodiversity across wide ecological  
426 and environmental gradients for plants, but most likely also for other organisms present in the  
427 soil. These methods are promising for biodiversity studies of many organism groups that are  
428 otherwise difficult to sample and identify (e.g. nematodes, fungi, protists, and arthropods). High  
429 throughput sequencing (HTS) methods produce numerous errors [e.g. 46, 47] and it has been  
430 suggested that richness measures should be avoided altogether for HTS studies [48]. Despite the  
431 remaining challenge of relating genetic units to well-known taxonomic entities, our results along  
432 with those presented in [39] indicate that reliable metrics of  $\alpha$ -diversity and community  
433 composition are achievable. With respect to taxonomic annotation, reference databases are far  
434 from complete and the taxonomic annotation of reference sequences are often erroneous.  
435 Furthermore, for many groups of organisms, we have still only described and named a fraction of  
436 the actual species diversity, and the underlying genetic diversity within and between species is  
437 largely unknown for most taxa, leading to uncertainties in OTU/species delimitation and

438 taxonomic assignment of sequence data. This also means that ecological interpretation of  
439 OTU/species assemblages assessed by eDNA is largely impossible as there is little ecological  
440 knowledge that can be linked to OTUs. Thus, for eDNA-based biodiversity assessment to further  
441 mature, molecular biologists, ecologists, and taxonomists need to work closely together to  
442 produce well-annotated reference databases. Our environmental samples for eDNA, including  
443 soil and litter samples as well as extracted DNA will be preserved for the future. This material  
444 represents a unique resource for the further development of methods within ecology and eDNA.  
445 As more efficient technologies become available in the future, it will be possible to process this  
446 material at an affordable cost and derive further insights on the relationship between traditional  
447 species occurrence, OTU data and environmental variation.

## 448 **Conclusion**

449 We have presented a comprehensive protocol to obtain a representative, unbiased sample of  
450 multi-taxon biodiversity stratified with respect to the major abiotic gradients. By testing and  
451 evaluating the protocol, we conclude that it is operational and that observed biodiversity  
452 variation may be attributed to measured abiotic and biotic variables. We developed our sampling  
453 protocol based on the ecospace concept, and with this study, we took the first step towards  
454 general models and model inferences with transferability to terrestrial ecosystems and biotas in  
455 other parts of the world. We believe the protocol is also useful for monitoring biodiversity i.e.  
456 tracking changes in biodiversity through time. Meta-barcoding of environmental DNA offers a  
457 promising alternative to traditional inventories (economically and logistically), but barcode  
458 reference libraries are still far from complete. Thus, combining classical taxonomic identification  
459 with metabarcoding of environmental DNA currently appears to offer the most promising  
460 approach to biodiversity research.

461 **Additional files**

462 **Additional file 1: Appendix A:** Site characteristics for each of the 130 40 × 40 m sites.

463 **Additional file 2: Appendix B:** Protocols for data collection.

464 **Additional file 3: Appendix C:** Ranges of environmental (abiotic and biotic) variables  
465 measured within the 130 sites as well as species richness of various taxonomic groups.

466 **Additional file 4: Appendix D:** Temporal and spatial continuity for the 130 Biowide sites.

467 **Additional file 5: Appendix E:** Relative richness of arthropods, bryophytes, gastropods, lichens,  
468 macrofungi and vascular plants across all 130 sites

469 **Additional file 6: Appendix F:** Correlation matrix for NMDS axes 1, 2 and 3 and environmental  
470 variables

471 **Additional file 7: Appendix G:** Number of species in each arthropod family for natural habitats,  
472 species richness hotspots, arable land and plantations.



473 **Declarations**

474 *Ethics approval and consent to participate*

475 Not applicable

476 *Consent for publication*

477 Not applicable

478 *Availability of data and material*

479 The datasets used and/or analysed during the current study are available from the corresponding  
480 author on reasonable request.

481 *Competing interests*

482 The authors declare that they have no competing interests

483 *Funding*

484 RE, LB, IG, TL, TGF, AAI, and AKB were supported by a grant from VILLUM foundation  
485 (Biowide, VKR-023343). VILLUM foundation did not play a role in the design of the study, data  
486 collection, analyses, interpretation of data or writing of the manuscript.

487 *Authors' contributions*

488 AKB, HHB, AC, TGF, AJH, TL, MDDH and RE conceived and designed the study. AKB, HHB,  
489 LB, KF, TGF, IG, TL, GN, LS, US, and RE conducted field work. AKB, RE, LD, TTH, and  
490 TGF analyzed the data and prepared the figures. LB, KF, IG, MDDH, TL, LS, US, AAI, and  
491 HHB sorted and identified specimens. IBN, CP and SSTM performed the DNA lab work. AKB,  
492 HHB, LB, ATC, KF, IG, MDDH, TTH, TGF, TL, GSN, LS, US, and RE wrote the manuscript.  
493 All authors have read and approved the final version of the manuscript.

494 *Acknowledgements*

495 We thank Ako O. Mirza for plant and soil lab work, Vagn Alstrup and Roar Skovlund Poulsen  
496 for lichen surveys, volunteers that have helped in data collection, land owners, Karl-Henrik  
497 Larsson for aid in identifying critical corticioid fungi, Leif Örstadius for identifying Psathyrella  
498 collections. In regard to identification of invertebrate specimens, we would like to thank Henning  
499 Petersen for identifying Springtails (Collembola), Hjalte Kjærby for identifying Grasshoppers  
500 (Orthoptera) and Harvestmen (Opilliones), Kåre Fog for identifying snails (Gastropoda), Kåre  
501 Würtz Sørensen for identifying various Wasps (Symphyta, Sphecoidea, Crabronidae, and  
502 Vespidae), Lars Dyhrberg Bruun for identifying spiders (Araneae), Lars Brøndum for identifying  
503 Hoverflies (Syrphidae), Carrion Beetles (Silphidae) as well as Scarabs (Scarabidae), Lars  
504 Skipper for identifying True bugs (Heteroptera), Maja Møholt for identifying Dung beetles  
505 (Aphodius, Onthophagus and Geotrupidae) and Cantharidae, Marianne Graversen for identifying  
506 Longhorn beetles (Cerambycidae) and Ladybugs (Coccinellidae), Peter Wiberg-Larsen for  
507 identifying Caddisflies (Trichoptera), Mathias Holm for identifying True weevils and Seed  
508 weevils (Curculionidae and Apionidae), Monica Aimeé Harlund Oyre for identifying various  
509 Dipterans (Syrphida, Tachinadae, Stratiomyidae, Acroceridae, Rhagionidae, Tephritidae,  
510 Platybatidae, Asilidae) as well as Strepsipterans (Strepsiptera) and Book- and Barklice  
511 (Psocoptera), Morten D. D. Hansen for identifying Bees (Apoidea), Carrion beetles (Silphidae),  
512 Click beetles (Elateridae), Scarabs (Scarabaeidea) and Dung beetles (*Aphodius*, *Onthophagus*  
513 and Geotrupidae), Ole Fogh Nielsen for identifying net-winged insects (Neuroptera) and  
514 Strepsipterans (Strepsiptera), Oskar Liset Pryds Hansen and Emil Skovgaard Brandtoft for  
515 identifying Ground beetles (Carabidae), Sofie Amund Kjeldgaard and Steffen Kjeldgaard for  
516 identifying Owllet moths (Noctuidae), Mathias G. Skytte for identifying Rove beetles  
517 (Staphylinidae), Simon Haarder for identifying galling and mining arthropods, and Ulrik Hasle

518 Nielsen for identifying Cicadas (Cicadoidea) as well as numerous other volunteers. In regard to  
519 carrying out the eDNA lab work we would like to thank Anne Aagaard Lauridsen, Sarah Mak,  
520 Stine Raith Richter, Carlotta Pietroni and Ida Broman Nielsen. Thomas Stjernegaard Jeppesen  
521 (GBIF) is thanked for making the fungal eDNA dataset publicly available through the GBIF  
522 portal.

523 **Tables**

524 **Table 1: Stratification of sites in the survey.**

| Category   | Class            | Successional stage | Moisture | Fertility | Number of sites |
|------------|------------------|--------------------|----------|-----------|-----------------|
| Arable     | Rotational       | -                  | -        | -         | 5               |
| Arable     | Ley              | -                  | -        | -         | 5               |
| Arable     | Old field        | -                  | -        | -         | 5               |
| Plantation | Beech            | -                  | -        | -         | 5               |
| Plantation | Oak              | -                  | -        | -         | 5               |
| Plantation | Spruce           | -                  | -        | -         | 5               |
| Hotspots   | Hotspots         | -                  | -        | -         | 10              |
| Natural    | Early/Dry/Rich   | Early              | Dry      | Rich      | 5               |
| Natural    | Mid/Dry/Rich     | Mid                | Dry      | Rich      | 5               |
| Natural    | Late/Dry/Rich    | Late               | Dry      | Rich      | 5               |
| Natural    | Early/Moist/Rich | Early              | Moist    | Rich      | 5               |
| Natural    | Mid/Moist/Rich   | Mid                | Moist    | Rich      | 5               |
| Natural    | Late/Moist/Rich  | Late               | Moist    | Rich      | 5               |
| Natural    | Early/Wet/Rich   | Early              | Wet      | Rich      | 5               |
| Natural    | Mid/Wet/Rich     | Mid                | Wet      | Rich      | 5               |
| Natural    | Late/Wet/Rich    | Late               | Wet      | Rich      | 5               |
| Natural    | Early/Dry/Poor   | Early              | Dry      | Poor      | 5               |
| Natural    | Mid/Dry/Poor     | Mid                | Dry      | Poor      | 5               |
| Natural    | Late/Dry/Poor    | Late               | Dry      | Poor      | 5               |
| Natural    | Early/Moist/Poor | Early              | Moist    | Poor      | 5               |
| Natural    | Mid/Moist/Poor   | Mid                | Moist    | Poor      | 5               |
| Natural    | Late/Moist/Poor  | Late               | Moist    | Poor      | 5               |
| Natural    | Early/Wet/Poor   | Early              | Wet      | Poor      | 5               |
| Natural    | Mid/Wet/Poor     | Mid                | Wet      | Poor      | 5               |
| Natural    | Late/Wet/Poor    | Late               | Wet      | Poor      | 5               |

525  
 526 The sites are sub-divided into four categories (arable, plantations, species richness hotspots, and  
 527 natural). The natural sites were stratified across specific levels of succession (early, mid, and  
 528 late), soil moisture (wet, moist, and dry) and soil fertility (rich and poor), while this was the case  
 529 for the other classes of sites. The number of sites within each of the 25 classes is given.

530 **Table 2: Species richness and sample coverage across habitats per taxonomic group**

|                 | Habitat type |            |           |          |             | Coverage     |              | New records in DK |
|-----------------|--------------|------------|-----------|----------|-------------|--------------|--------------|-------------------|
|                 | Total        | Natural    | Hotspots  | Arable   | Plantations | Across sites | Within sites |                   |
| Vascular plants | 719          | 601 (225)  | 330 (21)  | 192 (47) | 131 (2)     | 0.97         | -            |                   |
| Mosses          | 254          | 221 (106)  | 96 (11)   | 20 (3)   | 78 (4)      | 0.97         | -            |                   |
| Lichens         | 200          | 183 (92)   | 76 (9)    | 19 (5)   | 58 (3)      | 0.96         | -            | 1                 |
| Fungi           | 1774         | 1532 (995) | 615 (128) | 146 (18) | 557 (131)   | 0.92         | -            | 110               |
| Gallers/miners  | 203          | 169 (108)  | 48 (10)   | 19 (6)   | 41 (16)     | 0.86         | -            | 12                |
| Gastropods      | 75           | 72 (18)    | 42 (0)    | 19 (1)   | 38 (2)      | 0.99         | -            |                   |
| Araneae         | 335          | 313 (102)  | 147 (5)   | 126 (4)  | 127 (12)    | 1            | 0.87         | 3                 |
| Coleoptera      | 554          | 473 (215)  | 154 (23)  | 203 (49) | 135 (17)    | 1            | 0.91         |                   |
| Carabidae       | 123          | 104 (43)   | 34 (3)    | 51 (15)  | 35 (1)      | 1            | 0.93         |                   |
| Hemiptera       | 446          | 470 (188)  | 192 (13)  | 168 (9)  | 107 (8)     | 1            | 0.79         | 7                 |
| Diptera         | 196          | 181 (89)   | 63 (9)    | 77 (12)  | 35 (4)      | 0.99         | 0.79         | 1                 |
| Syrphidae       | 98           | 89 (42)    | 31 (2)    | 42 (6)   | 20 (2)      | 0.98         | 0.81         |                   |
| Hymenoptera     | 186          | 180 (104)  | 53 (14)   | 40 (6)   | 28 (5)      | 0.98         | 0.71         | 1                 |
| Lepidoptera     | 127          | 127 (71)   | 31 (3)    | 33 (3)   | 16 (2)      | 0.87         | 0.67         |                   |
| Trichoptera     | 80           | 77 (39)    | 23 (1)    | 24 (2)   | 16 (1)      | 0.99         | 0.92         |                   |
| Psocoptera      | 37           | 41 (8)     | 23 (0)    | 26 (0)   | 18 (1)      | -            | -            |                   |
| Neuroptera      | 23           | 21 (8)     | 9 (1)     | 7 (0)    | 7 (3)       | -            | -            |                   |
| Orthoptera      | 20           | 20 (5)     | 11 (0)    | 10 (1)   | 3 (0)       | -            | -            |                   |
| Opiliones       | 18           | 17 (3)     | 11 (0)    | 9 (0)    | 14 (0)      | -            | -            |                   |
| Prostigmata     | 5            | 4 (4)      | 2 (1)     | -        | -           | -            | -            |                   |
| Strepsiptera    | 2            | 2 (1)      | -         | 1 (0)    | 1 (0)       | -            | -            | 1                 |
| Raphidioptera   | 2            | 2 (2)      | -         | -        | -           | -            | -            |                   |
| Plecoptera      | 1            | 1 (1)      | -         | -        | -           | -            | -            |                   |

531

532 Number of species per taxonomic group found in natural sites (n=90), species richness hotspots (n=10), plantations (n=15) arable land  
533 (n=15), and plantations (n=15). Gallers/miners represent multiple insect taxa (see appendix B for a full list). Data for insects are given  
534 per order with additional rows for the species-rich families of Carabidae and Syrphidae. The number of unique species for each habitat  
535 type and taxonomic group is given in brackets. Across sites coverage is the proportion of species likely to be found across all 130  
536 sites, which were actually observed as estimated by extrapolation using the iNEXT package. Within sites coverage is the mean of the  
537 site specific coverage values across the 130 sites for invertebrates with abundance data. The number of new species for Denmark  
538 found during the project is also given for each taxonomic group.

539 **Figures**

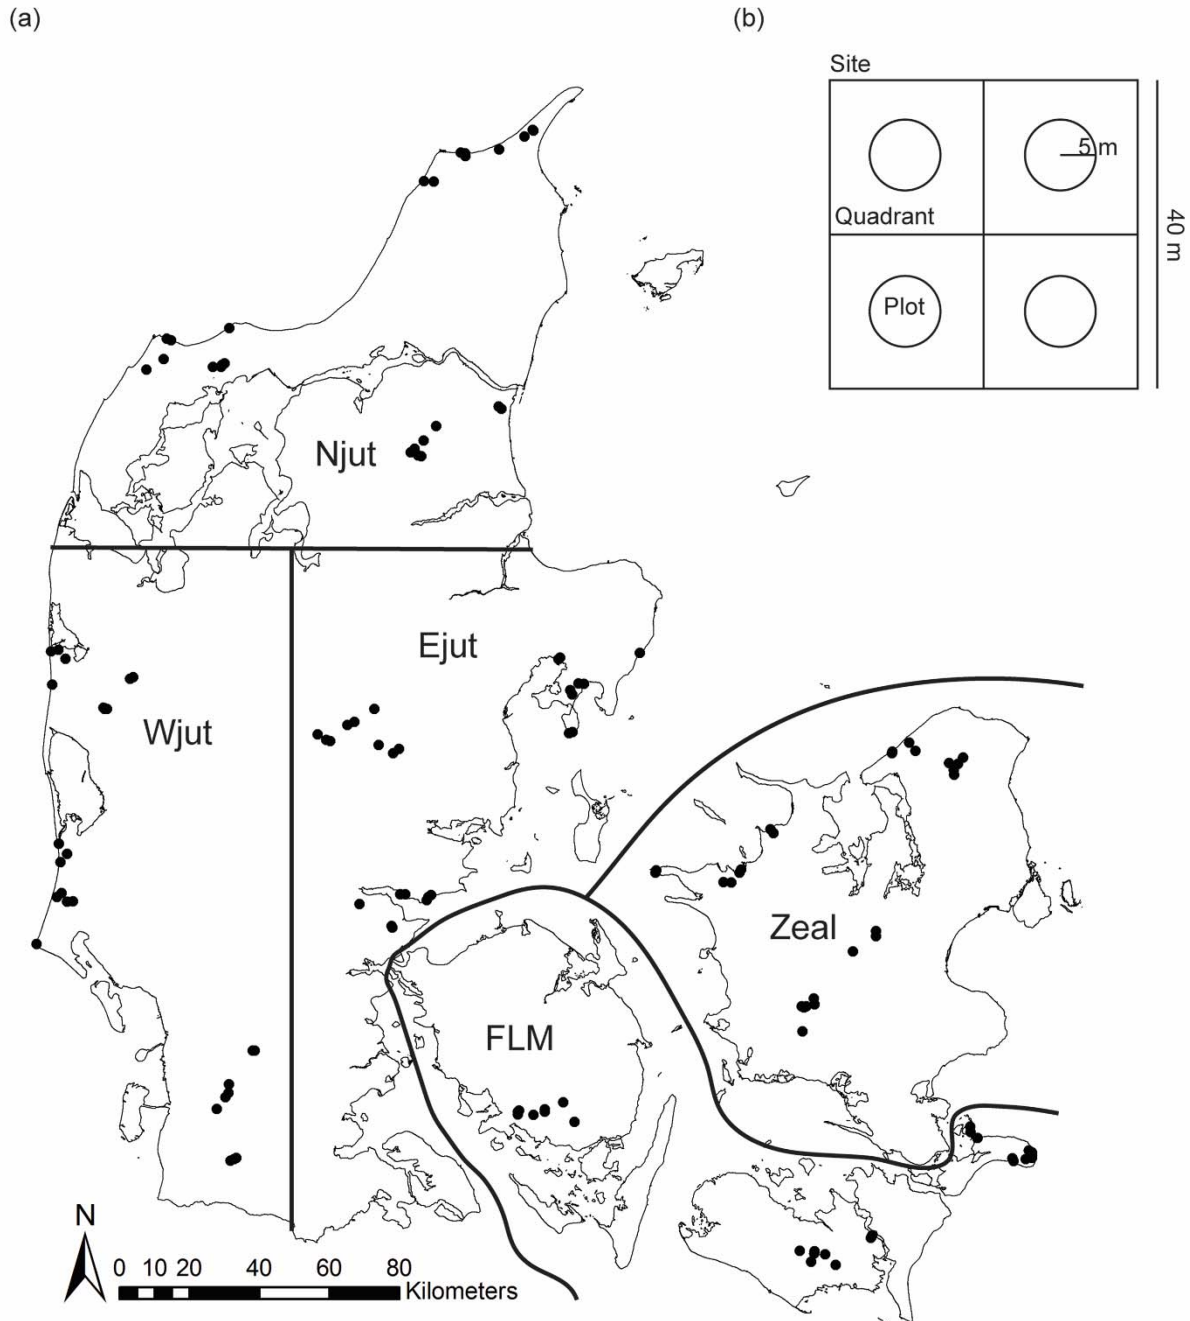

540 **Figure 1:** a) Map of Denmark showing the location of the 130 sites grouped into 15 clusters

542 within five regions (Njut: Northern Jutland, Wjut: Western Jutland, Ejut: Eastern Jutland, FLM:

543 Funen, Lolland, Møn, Zealand: Zealand). b) Site layout with four  $20 \times 20$  m quadrants each  
544 containing a 5 m radius circle (plot).

545



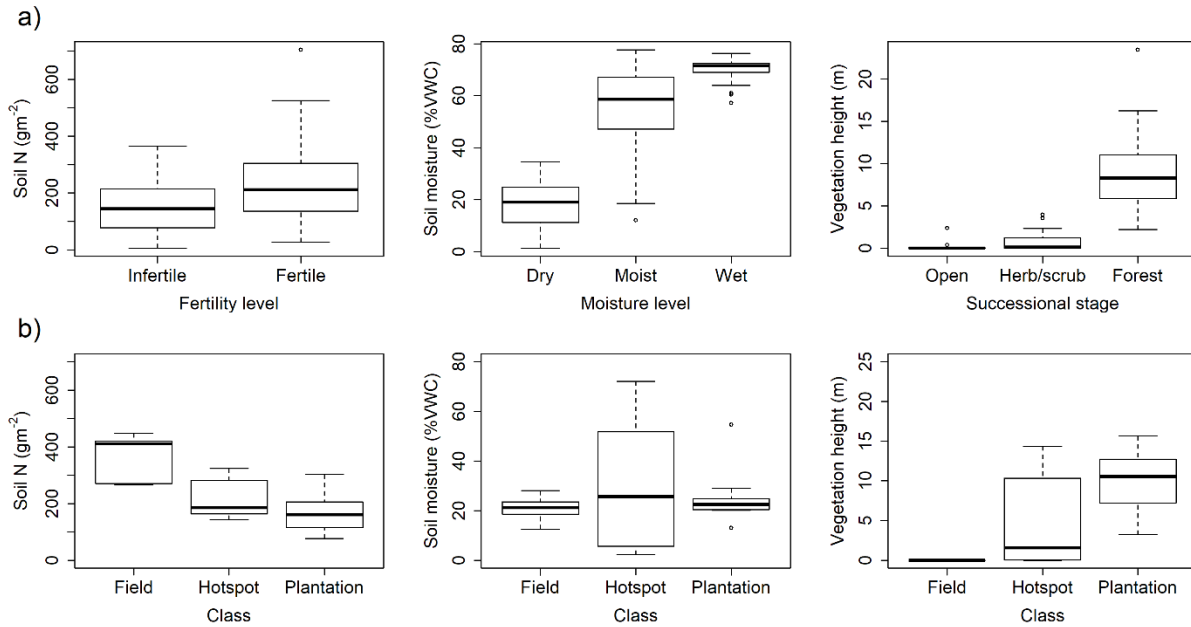

546  
547 **Figure 2:** Validation of the stratification scheme used in site selection. Boxplots of measured  
548 values of nutrient levels (soil N g/m<sup>2</sup>), moisture levels (trimmed site mean % Volumetric Water  
549 Content (VWC)), and vegetation height (mean LIDAR canopy height (m)) for the a) 90 natural  
550 sites of different fertility levels (infertile, fertile), moisture levels (dry, moist, wet), and  
551 successional stages (early (open), mid (herb/scrub), late (forest)) and b) the 15 plantations, 15  
552 fields and 10 species richness hotspots.

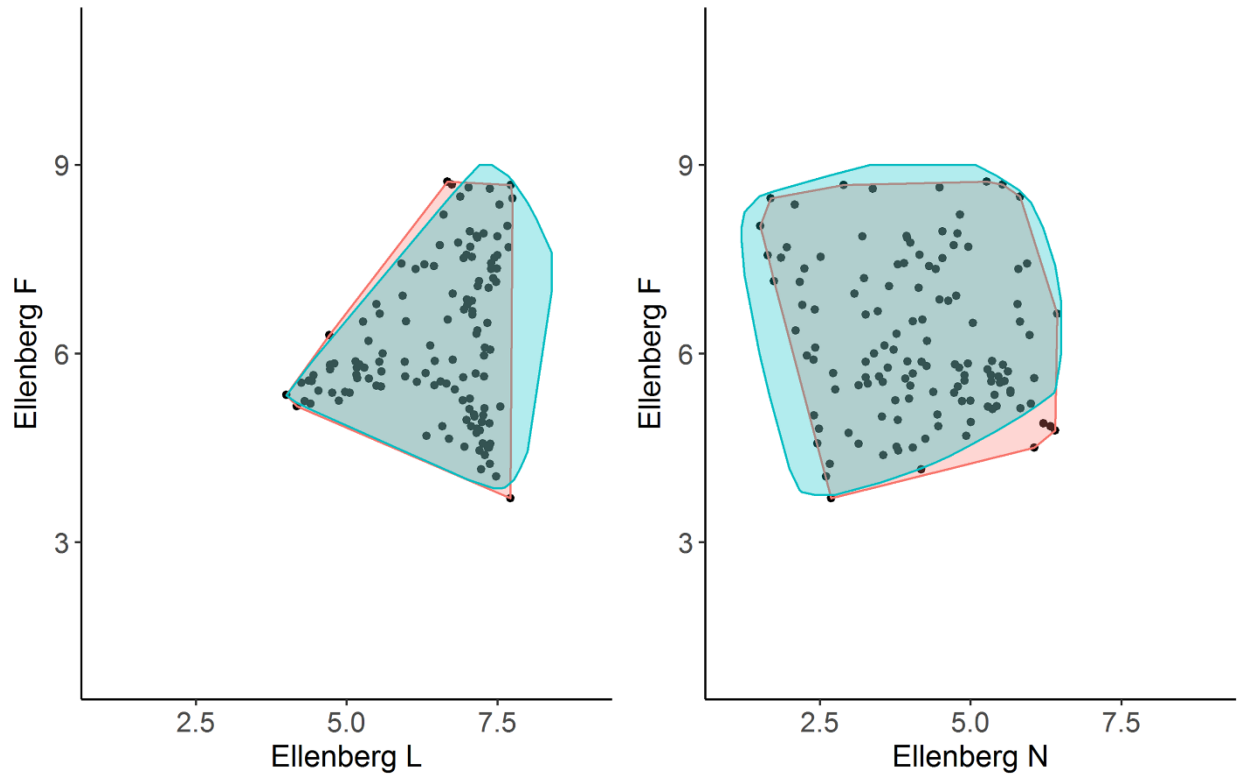

553  
554 **Figure 3:** 95 percentile convex hull plots of Ellenberg F, L and N values from a reference data  
555 set ([www.naturdata.dk](http://www.naturdata.dk)) of open and forest habitat types (blue, n= 59 227) as well as the data set  
556 used in this study, Biowide (red, n=130). Black dots represent Ellenberg values of the 130  
557 Biowide sites.

558

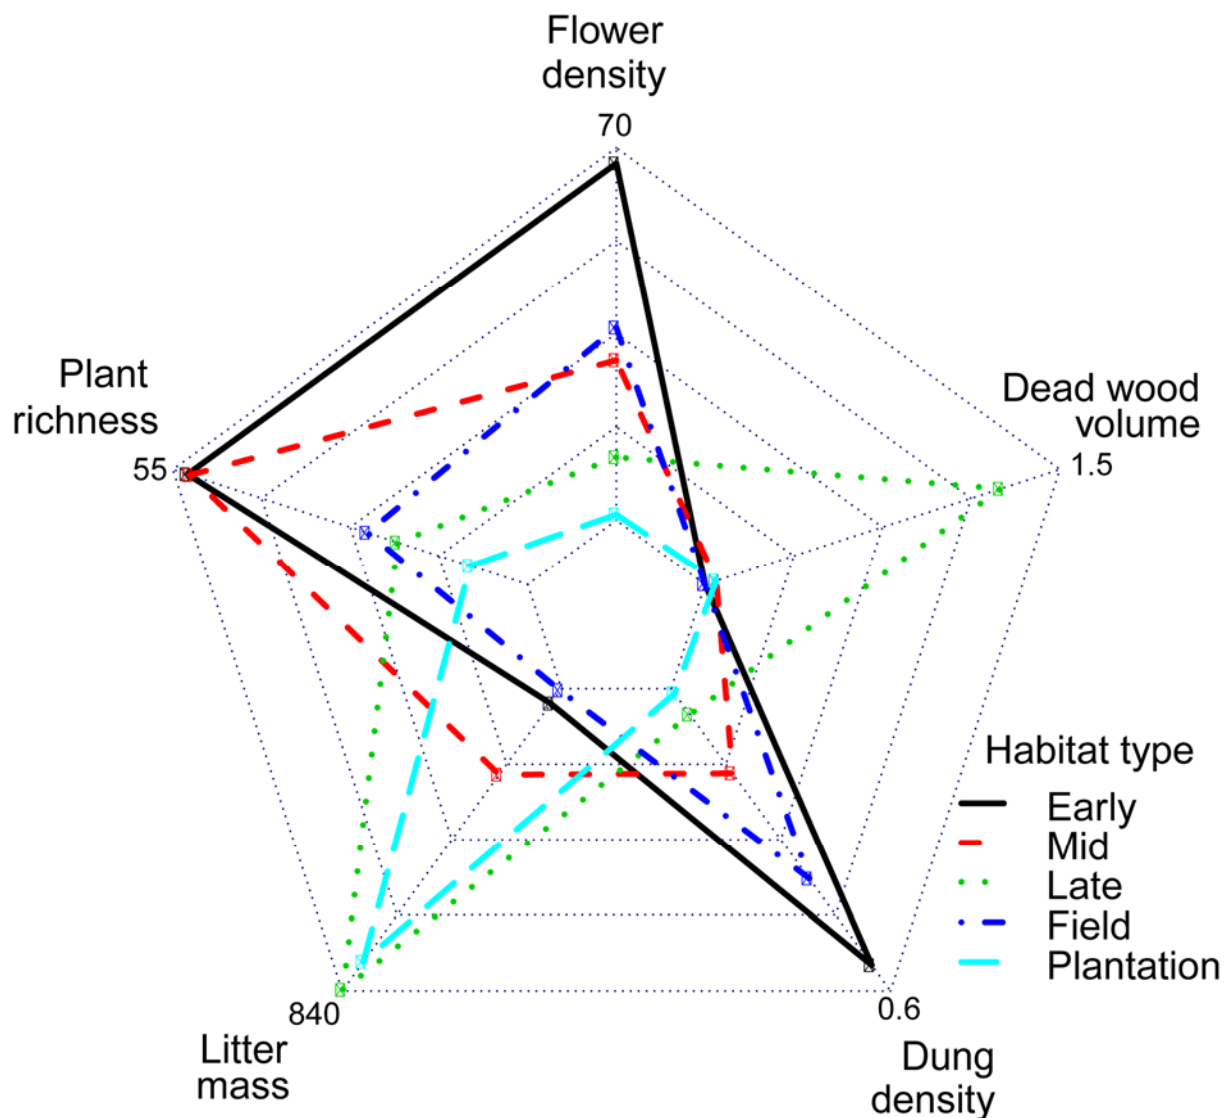

559  
560 **Figure 4:** Habitat mean values for various carbon resources in the 130 40 × 40 m sites. Volume  
561 of dead wood ( $\text{m}^3/\text{ha}$ ), density of dung (cow, sheep, deer, horse, hare) ( $\text{number}/\text{m}^2$ ), summed  
562 flower density in April, June and August ( $\text{number}/\text{m}^2$ ), litter mass ( $\text{g}/\text{m}^2$ ) and plant species  
563 richness per site are depicted for natural habitat types (early, mid and late successional stage),  
564 fields and plantations.

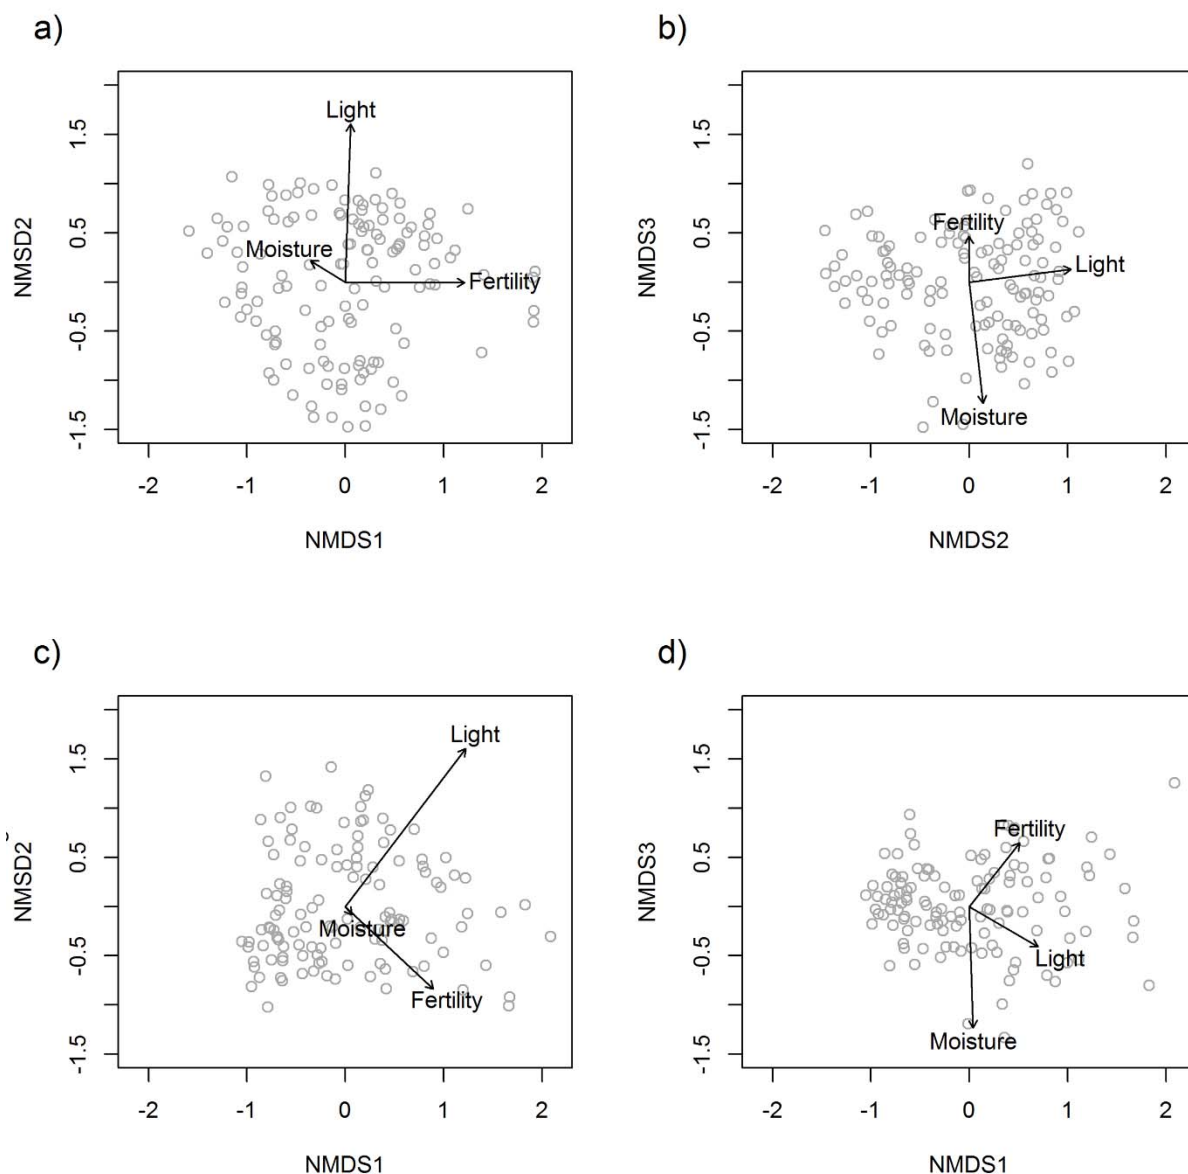

565  
566 **Figure 5:** Three dimensional NMDS plots for plants with a) showing axis 2 against axis 1 and b)  
567 showing axis 3 against axis 2 and fungi with c) showing axis 2 against axis 1 and d) showing  
568 axis 3 against axis 1. The three main gradients used for selecting the 130 sites (fertility, moisture,  
569 successional stage) are overlaid as arrows (from an envfit analyses in the R package Vegan). The  
570 ordinations are based on plant species lists from the 130 sites a) & b) or macrofungi species lists  
571 from the 124 sites with more than five species c & d) and the arrows reflect soil moisture  
572 measured using a soil moisture meter, fertility measured as soil N and light measured as light

573 intensity using HOBO loggers. The ordination plots illustrate that the community composition of  
574 vascular plants and macrofungi actually reflect the main gradients the sites were selected to  
575 cover. The scatter of dots shows the variation in abiotic conditions across the 130 sites.  
576 Correlations and p-values can be seen in Appendix D.  
577

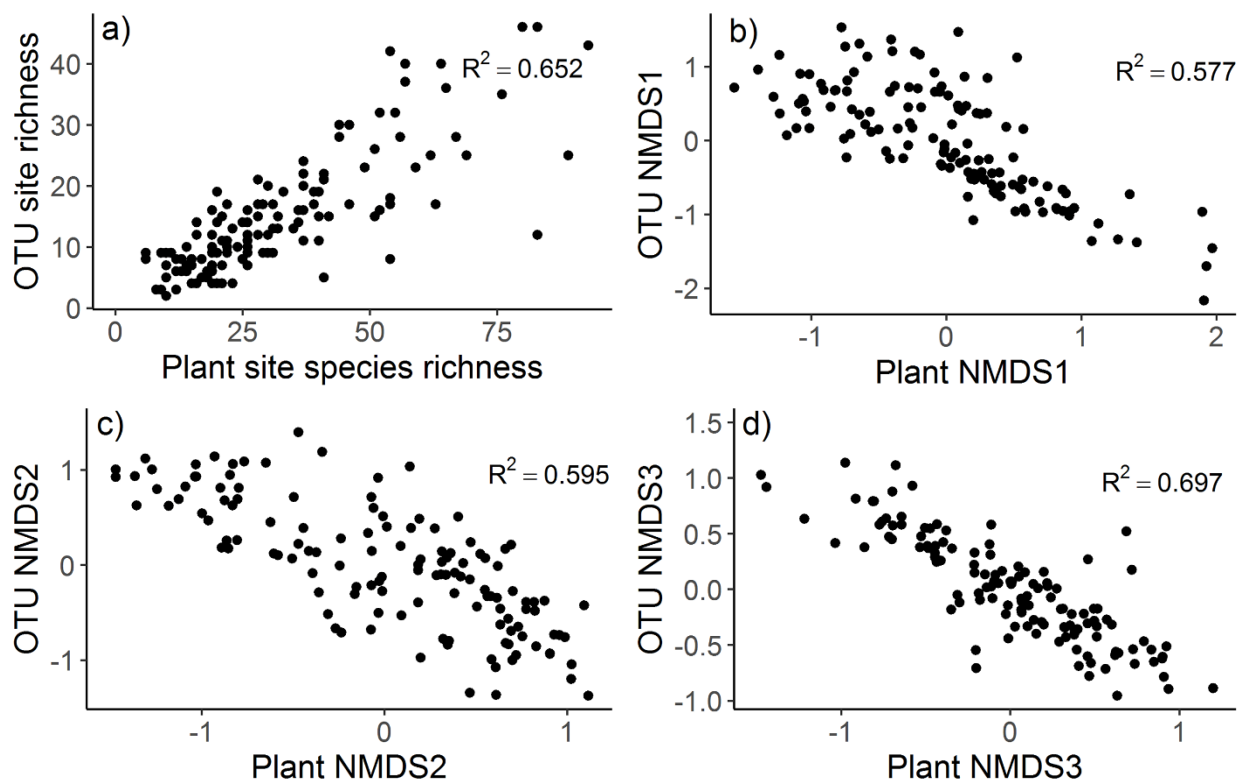

578  
579 **Figure 6:** Correlation between a) observed site plant species richness and OTU site ‘richness’ for  
580 the 130 sites (Spearman Rho:  $R^2=0.652$ ,  $S = 70457$ , p-value < 0.001), b-d) observed site plant  
581 community composition and OTU community composition for the 130 sites b) NMDS axes 1  
582 (Spearman Rho:  $R^2=0.576$ ,  $S = 644210$ , p-value < 0.001), c) NMDS axes 2 (Spearman Rho:  
583  $R^2=0.594$ ,  $S = 648480$ , p-value < 0.001), and d) NMDS axes 3 (Spearman Rho:  $R^2=0.697$ ,  $S =$   
584  $671850$ , p-value < 0.001).

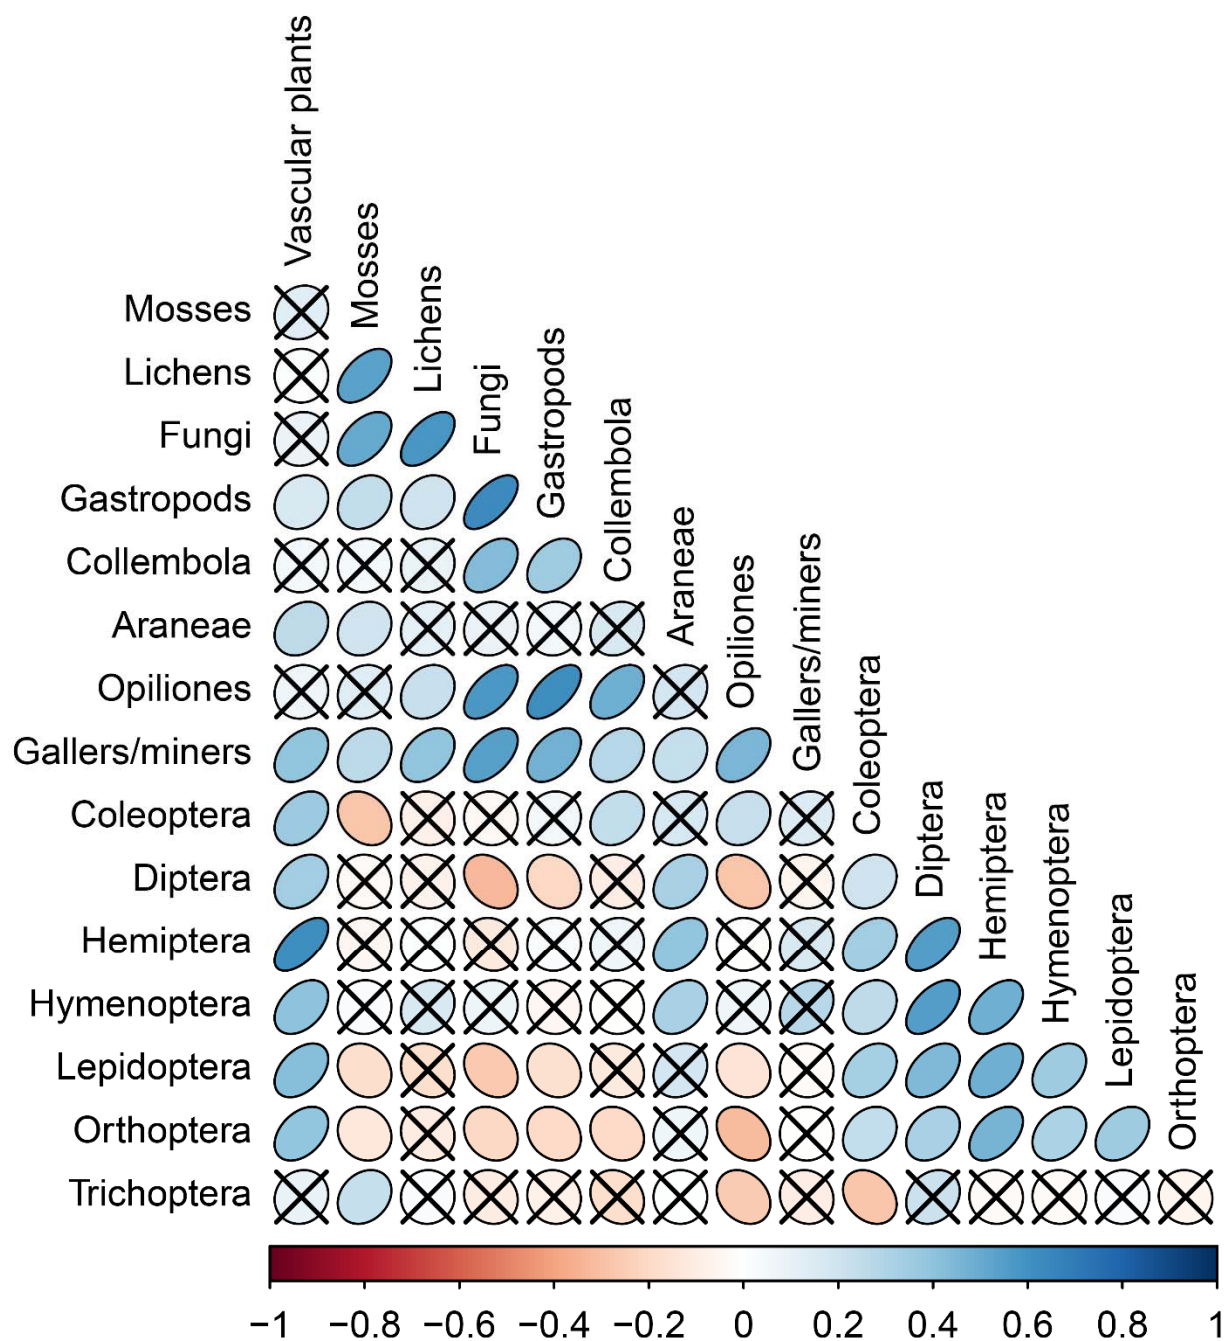

585 **Figure 7:** Cross correlation among the main taxonomic groups included in the study. The colour  
 586 and shape of the symbol is scaled according to spearman rank correlation coefficients and non-  
 587 significant ( $p > 0.05$ ) correlations are indicated by a cross.  
 588

## 589 References

- 590 1. Mora C, Tittensor DP, Adl S, Simpson AGB, Worm B: **How many species are there on Earth and**  
591 **in the ocean?** *PLoS Biol* 2011, **9**(8):e1001127.
- 592 2. Jetz W, McPherson JM, Guralnick RP: **Integrating biodiversity distribution knowledge: toward a**  
593 **global map of life.** *Trends Ecol Evol* 2012, **27**(3):151-159.
- 594 3. Isaac NJB, van Strien AJ, August TA, de Zeeuw MP, Roy DB: **Statistics for citizen science:**  
595 **extracting signals of change from noisy ecological data.** *Methods in Ecology and Evolution* 2014,  
596 **5**(10):1052-1060.
- 597 4. Nichols JD, Williams BK: **Monitoring for conservation.** *Trends Ecol Evol* 2006, **21**(12):668-673.
- 598 5. Taberlet P, Coissac E, Pompanon F, Brochmann C, Willerslev E: **Towards next-generation**  
599 **biodiversity assessment using DNA metabarcoding.** *Mol Ecol* 2012, **21**(8):2045-2050.
- 600 6. Thomsen PF, Willerslev E: **Environmental DNA – An emerging tool in conservation for**  
601 **monitoring past and present biodiversity.** *Biological Conservation* 2015, **183**:4-18.
- 602 7. Porazinska DL, Giblin-Davis RM, Esquivel A, Powers TO, Sung WAY, Thomas WK:  
603 **Ecometagenetics confirm high tropical rainforest nematode diversity.** *Mol Ecol* 2010,  
604 **19**(24):5521-5530.
- 605 8. Andersen K, Bird KL, Rasmussen M, Haile J, Breuning-Madsen H, Kjær KH, Orlando L, Gilbert  
606 MTP, Willerslev E: **Meta-barcoding of ‘dirt’ DNA from soil reflects vertebrate biodiversity.** *Mol*  
607 *Ecol* 2012, **21**(8):1966-1979.
- 608 9. Taberlet P, Prud’Homme SM, Campione E, Roy J, Miquel C, Shehzad W, Gielly L, Rioux D, Choler  
609 P, Clément J-C *et al*: **Soil sampling and isolation of extracellular DNA from large amount of**  
610 **starting material suitable for metabarcoding studies.** *Mol Ecol* 2012, **21**(8):1816-1820.
- 611 10. Yoccoz NG, Brathen KA, Gielly L, Haile J, Edwards ME, Goslar T, von Stedingk H, Brysting AK,  
612 Coissac E, Pompanon F *et al*: **DNA from soil mirrors plant taxonomic and growth form diversity.**  
613 *Mol Ecol* 2012, **21**(15):3647-3655.
- 614 11. Ficetola GF, Miaud C, Pompanon F, Taberlet P: **Species detection using environmental DNA**  
615 **from water samples.** *Biology Letters* 2008, **4**(4):423-425.
- 616 12. Thomsen PF, Kielgast JOS, Iversen LL, Wiuf C, Rasmussen M, Gilbert MTP, Orlando L, Willerslev E:  
617 **Monitoring endangered freshwater biodiversity using environmental DNA.** *Mol Ecol* 2012,  
618 **21**(11):2565-2573.
- 619 13. Shokralla S, Spall JL, Gibson JF, Hajibabaei M: **Next-generation sequencing technologies for**  
620 **environmental DNA research.** *Mol Ecol* 2012, **21**(8):1794-1805.
- 621 14. Taberlet P, Coissac E, Hajibabaei M, Rieseberg LH: **Environmental DNA.** *Mol Ecol* 2012,  
622 **21**(8):1789-1793.
- 623 15. Brunbjerg AK, Bruun HH, Moeslund JE, Sadler JP, Svenning J-C, Ejrnæs R: **Ecospace: A unified**  
624 **framework for understanding variation in terrestrial biodiversity.** *Basic and Applied Ecology*  
625 2017, **18**:86-94.
- 626 16. Belyea LR, Lancaster J: **Assembly rules within a contingent ecology.** *Oikos* 1999, **86**(3):402-416.
- 627 17. Ricklefs RE: **Community diversity - relative roles of local and regional processes.** *Science* 1987,  
628 **235**(4785):167-171.
- 629 18. Horák J, Kout J, Vodka Š, Donato DC: **Dead wood dependent organisms in one of the oldest**  
630 **protected forests of Europe: Investigating the contrasting effects of within-stand variation in a**  
631 **highly diversified environment.** *Forest Ecology and Management* 2016, **363**:229-236.
- 632 19. Seibold S, Bässler C, Brandl R, Gossner MM, Thorn S, Ulyshen MD, Müller J: **Experimental**  
633 **studies of dead-wood biodiversity — a review identifying global gaps in knowledge.** *Biological*  
634 *Conservation* 2015, **191**:139-149.
- 635 20. Laliberté E, Zeman G, Turner BL: **Environmental filtering explains variation in plant diversity**  
636 **along resource gradients.** *Science* 2014, **345**(6204):1602-1605.



- 637 21. Houseman GR, Gross KL: **Linking grassland plant diversity to species pools, sorting and plant**  
638 **traits.** *Journal of Ecology* 2011, **99**(2):464-472.
- 639 22. Rubæk GH, Kristensen K, Olesen SE, Østergaard HS, Heckrath G: **Phosphorus accumulation and**  
640 **spatial distribution in agricultural soils in Denmark.** *Geoderma* 2013, **209–210**:241-250.
- 641 23. Arler F, Jørgensen MS, Galland D, Sørensen EM: **Kampen om m<sup>2</sup> - Prioritering af fremtidens**  
642 **arealanvendelse i Danmark. Fonden Teknologirådet.** [http://www.tekno.dk/wp-](http://www.tekno.dk/wp-content/uploads/2015/08/Prioritering-af-fremtidens-arealanvendelse-i-Danmark.pdf)  
643 [content/uploads/2015/08/Prioritering-af-fremtidens-arealanvendelse-i-Danmark.pdf](http://www.tekno.dk/wp-content/uploads/2015/08/Prioritering-af-fremtidens-arealanvendelse-i-Danmark.pdf). In.;  
644 2015.
- 645 24. Nygaard B, Juel A, Fredshavn JR: **Ændringer i det § 3-beskyttede naturareal 1995-2014.**  
646 **Resultater fra Naturstyrelsens opdateringsprojekt.** In. Edited by Aarhus Universitet DNCfMoE,  
647 106 s. - Teknisk rapport fra DCE - Nationalt Center for Miljø og Energi nr. 79; 2016.
- 648 25. Williams P, Gibbons D, Margules C, Rebelo A, Humphries C, Pressey R: **A Comparison of**  
649 **Richness Hotspots, Rarity Hotspots, and Complementary Areas for Conserving Diversity of**  
650 **British Birds.** *Conserv Biol* 1996, **10**(1):155-174.
- 651 26. **Terrestriske Naturtyper 2004 – 2015. NOVANA. Aarhus Universitet, DCE – Nationalt Center for**  
652 **Miljø og Energi.** [www.novana.au.dk](http://www.novana.au.dk).
- 653 27. Council Directive 92/43/EEC: **On the conservation of natural habitats and of wild fauna and**  
654 **flora. European Commission.** 1992.
- 655 28. Hill MO, Mountford JO, Roy DB, Bunce RGH: **Ellenberg's indicator values for British plants :**  
656 **ECOFACT volume 2 : Technical Annex.** Natural Environment Research Council: Centre for  
657 Ecology and Hydrology; 1999.
- 658 29. Grime JP, Hodgson JG, Hunt R: **Comparative plant ecology: a functional approach to common**  
659 **British species.** London: Unwin Hyman; 1989.
- 660 30. Ejrnæs R, Bruun HH: **Gradient analysis of dry grassland vegetation in Denmark.** *Journal of*  
661 *Vegetation Science* 2000, **11**(4):573-584.
- 662 31. Lomolino MV, Riddle BR, Brown JH, Brown JH: **Biogeography.** In.: Sinauer Associates Sunderland,  
663 MA; 2006: 65-96.
- 664 32. Bijl Lvd, Boutrup S, Jensen PN: **NOVANA. Det nationale program for overvågning af vandmiljøet**  
665 **og naturen. Programbeskrivelse 2007-2009 - del 2. Danmarks Miljøundersøgelser, Aarhus**  
666 **Universitet. Faglig rapport fra DMU nr 615 2007.**
- 667 33. Schmidt P-A, Bálint M, Greshake B, Bandow C, Römbke J, Schmitt I: **Illumina metabarcoding of a**  
668 **soil fungal community.** *Soil Biology and Biochemistry* 2013, **65**:128-132.
- 669 34. White N, Engeman R, Sugihara R, Krupa H: **A comparison of plotless density estimators using**  
670 **Monte Carlo simulation on totally enumerated field data sets.** *BMC Ecology* 2008, **8**(1):6.
- 671 35. Hsieh TC, Ma KH, Chao A: **iNEXT: an R package for rarefaction and extrapolation of species**  
672 **diversity (Hill numbers).** *Methods Ecol Evol* 2016, **7**(12):1451-1456.
- 673 36. R Core team: **R: a language and environment for statistical computing.** R Foundation for  
674 **Statistical Computing, Vienna, Austria.** In.; 2015.
- 675 37. Oksanen J, Blanchet FG, Kindt R, Legendre P, O'Hara RB, Simpson GL, Solymos P, Stevens MHH,  
676 Wagner H: **Package 'vegan': Community Ecology Package. Version 1.17-2.** [http://cran.r-](http://cran.r-project.org/web/packages/vegan/vegan.pdf)  
677 [project.org/web/packages/vegan/vegan.pdf](http://cran.r-project.org/web/packages/vegan/vegan.pdf). 2010.
- 678 38. Koljalg U, Nilsson RH, Abarenkov K, Tedersoo L, Taylor AFS, Bahram M, Bates ST, Bruns TD,  
679 Bengtsson-Palme J, Callaghan TM *et al*: **Towards a unified paradigm for sequence-based**  
680 **identification of fungi.** *Mol Ecol* 2013, **22**(21):5271-5277.
- 681 39. Frøslev TG, Kjoller R, Bruun HH, Ejrnæs R, Brunbjerg AK, Pietroni C, Hansen AJ: **Algorithm for**  
682 **post-clustering curation of DNA amplicon data yields reliable biodiversity estimates.** *Nature*  
683 *Comm* 2017, **8**:1188.

- 684 40. Kraft NJB, Adler PB, Godoy O, James EC, Fuller S, Levine JM: **Community assembly, coexistence**  
685 **and the environmental filtering metaphor.** *Functional Ecology* 2015, **29**(5):592-599.
- 686 41. Gillison AN, Brewer KRW: **The use of gradient directed transects or gradsects in natural**  
687 **resource surveys.** *Journal of Environmental Management* 1985, **20**:103-127.
- 688 42. Popic TJ, Davila YC, Wardle GM: **Evaluation of common methods for sampling invertebrate**  
689 **pollinator assemblages: net sampling out-perform pan traps.** *PLoS One* 2013, **8**(6):e66665.
- 690 43. Standen V: **The adequacy of collecting techniques for estimating species richness of grassland**  
691 **invertebrates.** *Journal of Applied Ecology* 2000, **37**(5):884-893.
- 692 44. CaraDonna PJ, Petry WK, Brennan RM, Cunningham JL, Bronstein JL, Waser NM, Sanders NJ:  
693 **Interaction rewiring and the rapid turnover of plant–pollinator networks.** *Ecology Letters* 2017,  
694 **20**(3):385-394.
- 695 45. Valverde J, Gómez JM, Perfectti F: **The temporal dimension in individual-based plant**  
696 **pollination networks.** *Oikos* 2016, **125**(4):468-479.
- 697 46. Brown SP, Veach AM, Rigdon-Huss AR, Grond K, Lickteig SK, Lothamer K, Oliver AK, Jumpponen  
698 A: **Scraping the bottom of the barrel: are rare high throughput sequences artifacts?** *Fungal*  
699 *Ecology* 2015, **13**:221-225.
- 700 47. Kunin V, Engelbrektson A, Ochman H, Hugenholtz P: **Wrinkles in the rare biosphere:**  
701 **pyrosequencing errors can lead to artificial inflation of diversity estimates.** *Environmental*  
702 *Microbiology* 2010, **12**(1):118-123.
- 703 48. Bálint M, Bahram M, Eren AM, Faust K, Fuhrman JA, Lindahl B, O'Hara RB, Öpik M, Sogin ML,  
704 Unterseher M *et al*: **Millions of reads, thousands of taxa: microbial community structure and**  
705 **associations analyzed via marker genes.** *FEMS Microbiol Rev* 2016, **40**(5):686-700.

706
